# 1 **Developmental plasticity in visual cortex is necessary for normal visuomotor** 2 **integration and visuomotor skill learning**

3 Felix C. Widmer<sup>1,2</sup> & Georg B. Keller<sup>1,2,3</sup>

4 <sup>1</sup>*Friedrich Miescher Institute for Biomedical Research, Basel, Switzerland.*

5 <sup>2</sup>*Faculty of Natural Sciences, University of Basel, Basel, Switzerland.*

6

7 <sup>3</sup>*Lead contact: [georg.keller@fmi.ch](mailto:georg.keller@fmi.ch)*

## 8 **SUMMARY**

9 **The experience of coupling between motor output and visual feedback is necessary for the**  
10 **development of visuomotor skills and shapes visuomotor integration in visual cortex. Whether**  
11 **these experience-dependent changes involve plasticity in visual cortex remains unclear. Here, we**  
12 **probed the role of NMDA receptor-dependent plasticity in mouse primary visual cortex (V1) during**  
13 **visuomotor development. Using a conditional knockout of NMDA receptors and a photoactivatable**  
14 **inhibitor of CaMKII, we locally perturbed plasticity in V1 during first visual experience, recorded**  
15 **neuronal activity in V1, and tested the mice in a visuomotor task. We found that perturbing plasticity**  
16 **before, but not after, first visuomotor experience reduces responses to unpredictable stimuli,**  
17 **diminishes the suppression of predictable feedback in V1, and impairs visuomotor skill learning later**  
18 **in life. Our results demonstrate that plasticity in the local V1 circuit during early life is critical for**  
19 **shaping visuomotor integration.**

20 *\*\*\* Dear reader, please note this manuscript is formatted in a standard submission format, and all*  
21 *statistical information is provided in Table S1. \*\*\**

## 22 **INTRODUCTION**

23 Movement results in predictable sensory consequences. Through experience, the brain learns this  
24 mapping from motor output to sensory feedback. Raised without coupling between movements and  
25 visual feedback during visual development, kittens fail to use visual input to guide movements with  
26 the impairment specific to the dimension in which the artificial uncoupling occurred (Hein and Held,  
27 1967; Held and Hein, 1963). The same coupling between locomotion and visual feedback is necessary  
28 to integrate visual and motor-related signals in primary visual cortex (V1). Under normal conditions,  
29 V1 has been shown to exhibit distinct and salient responses to unpredictable mismatches between  
30 movement and visual feedback in both humans and mice (Keller et al., 2012; Stanley and Miall, 2007;  
31 Zmarz and Keller, 2016). In mice raised from birth without coupling between movement and visual

32 feedback, mismatch responses are absent and only emerge after first exposure to normal visuomotor  
33 coupling (Attinger et al., 2017). Thus, the coupling between movement and visual feedback is essential  
34 for both visuomotor behavior and normal visuomotor integration in V1. It is still unclear, however,  
35 where the plasticity occurs that is driven by the experience of coupling between movement and visual  
36 feedback.

37 Given that V1 receives both the bottom-up visual input and signals consistent with a top-down  
38 prediction of visual feedback given movement (Leinweber et al., 2017) necessary to compute these  
39 mismatch responses, it has been speculated that mismatch responses are computed locally in V1.  
40 Neurons in layer 2/3 (L2/3) of V1 that are responsive to visuomotor mismatch receive balanced and  
41 opposing top-down motor-related and bottom-up visual input (Jordan and Keller, 2020), consistent  
42 with a subtractive computation of mismatch responses. Thus, it is possible that visuomotor experience  
43 establishes this balance between top-down and bottom-up input on individual L2/3 neurons in V1. If  
44 this were so, we would predict that the consequence of perturbing plasticity locally in V1 during  
45 visuomotor development would be reduced mismatch responses in these neurons.

46 Here, we tested this by interfering with plasticity locally in V1 during first visuomotor experience using  
47 two separate approaches. First, we used a local knockout of N-Methyl-D-aspartate (NMDA) receptors  
48 in V1 prior to first visuomotor experience. NMDA receptors are known to be involved in a wide variety  
49 of different forms of plasticity (Paoletti et al., 2013; Rodriguez et al., 2019), and are necessary for  
50 activity-dependent synaptic strengthening in cortex (Hasan et al., 2013; Kirkwood and Bear, 1994; Lo  
51 et al., 2013). In a parallel approach, to impair plasticity in V1 in a cell type specific manner, we used a  
52 photoactivatable inhibitor of the calcium/calmodulin-dependent protein kinase II (CaMKII). CaMKII  
53 has been shown to be an essential element of NMDA receptor-dependent plasticity (Barria and  
54 Malinow, 2005; Gambrill and Barria, 2011; Wang et al., 2011). NMDA receptors are thought to exert  
55 their influence on synaptic plasticity by increasing calcium influx into the cell, where calmodulin binds  
56 calcium and activates CaMKII. The idea that NMDA receptors and CaMKII are on the same plasticity  
57 pathway is supported by a number of findings. For example, spine enlargement triggered by NMDA  
58 receptor stimulation can be inhibited by blocking CaMKII (Herring and Nicoll, 2016). Additionally,  
59 activated CaMKII and NMDA receptors directly interact (Leonard et al., 1999) to form CaMKII-NMDA  
60 receptor complexes that are required for the induction of long-term potentiation (Barria and Malinow,  
61 2005), and likely control synaptic strength (Lisman et al., 2012). Thus, we expected that NMDA  
62 receptor knockout and CaMKII inhibition would have similar effects on the responses of L2/3 neurons.  
63 We find that both types of manipulations systematically impair the development of normal  
64 visuomotor integration in L2/3 neurons, commensurate with the impairment observed in mice that

65 are raised without experience of the coupling between movement and visual feedback (Attinger et al.,  
66 2017), but differ in the way they influence visual responses.

## 67 RESULTS

### 68 Knockout of *Grin1* prior to first visual experience impaired the development of normal visual and 69 visuomotor mismatch responses.

70 To determine the dependence of visuomotor integration specifically on local plasticity in V1 during  
71 development, we quantified the effect of a conditional knockout of NMDA receptors in V1, prior to  
72 first visual experience, on functional responses in V1 L2/3 neurons. To achieve this, we used NR1<sup>flox</sup>  
73 mice, which carry a modified version of the *Grin1* gene (also referred to as *NMDAR1*, an essential  
74 subunit of the NMDA receptor) that can be rendered inactive by Cre recombination (Tsien et al., 1996).  
75 We dark reared these mice from birth and injected an adeno-associated viral vector (AAV2/1-EF1 $\alpha$ -  
76 Cre-T2A-mCherry) to express Cre recombinase unilaterally into V1 at postnatal day P21, prior to first  
77 visual experience ( $\Delta$ *Grin1*<sub>juv</sub>; **Figures 1A and 1B**). At P30 we then injected a second AAV vector to  
78 express GCaMP6f (AAV2/1-EF1 $\alpha$ -GCaMP6f) bilaterally in both primary visual cortices to record  
79 neuronal activity in the knockout hemisphere and a within-mouse control hemisphere. Mice were  
80 then exposed to visual input for the first time in their life at P32, when they were introduced to a  
81 virtual environment that provided closed-loop feedback between forward locomotion and backward  
82 visual flow in a virtual corridor (Attinger et al., 2017). Mice were trained in this setup for 2 hours every  
83 other day for 12 days (for a total of 6 sessions), after which we then measured calcium activity in L2/3  
84 neurons using two-photon imaging (**Figure 1C**). We validated the method for the local knockout of  
85 *Grin1*, using an in situ hybridization with a *Grin1* mRNA probe in a subset of mice and found a marked  
86 reduction at the injection site of the Cre vector (**Figure 1D**). During the imaging experiments, mice  
87 were first exposed to closed-loop visual flow feedback in a virtual corridor (see Methods). To measure  
88 mismatch responses, we introduced brief (1 s) halts of visual flow at random times (Keller et al., 2012).  
89 To estimate the contributions of visual flow and locomotion separately, mice were then presented  
90 with a playback of the visual flow they had previously self-generated in the closed-loop session (we  
91 will refer to this as the open-loop session). To measure visual responses, mice were presented with  
92 full-field drifting gratings of different orientations. Finally, to isolate motor-related signals, we  
93 measured locomotion-related activity in complete darkness.

94 We found that visuomotor mismatch responses in the knockout hemisphere were reduced compared  
95 to the control hemisphere (**Figure 1E**), commensurate with the response reduction in mice that never  
96 experienced coupling between locomotion and backward visual flow (**Figure S1A**). We also found a  
97 reduction in grating onset responses (**Figure 1F**), but no evidence of a reduction in motor-related

98 activity upon running onset in a closed-loop environment (**Figure 1G**). The fact that mismatch and  
99 visual responses are influenced by NMDA receptor knockout is consistent with impairment of the  
100 comparator function of L2/3 (Jordan and Keller, 2020). An alternative explanation would be that the  
101 reduced responses are simply a consequence of an overall reduction in activity levels. However, this  
102 was not the case as comparing mean activity levels between control and knockout hemisphere  
103 showed no evidence of a reduction in activity (**Figure 1H**). Mismatch responses are thought to arise  
104 from a transient imbalance between opposing bottom-up visual inhibition and top-down motor-  
105 related excitation. A reduction of mismatch responses could be the result of a reduction in either top-  
106 down or bottom-up input, or a failure to appropriately match bottom-up inhibition and top-down  
107 excitation. To disambiguate these two possibilities, we estimated the contribution of bottom-up visual  
108 input and top-down motor-related input by calculating the correlation between neuronal activity and  
109 visual flow, and that between neuronal activity and locomotion for each neuron (**Figure 1I**). Consistent  
110 with responses in mice without an NMDA receptor knockout (Attinger et al., 2017), we found that in  
111 the control hemisphere neurons with high mismatch responses tended to show a negative correlation  
112 with visual flow and a positive correlation with running speed. In the knockout hemisphere we found  
113 that both the average correlation of activity with running speed and correlation of activity with visual  
114 flow were slightly, but significantly increased relative to the control hemisphere (mean correlation of  
115 activity with visual flow control hemisphere: -0.017,  $\Delta Grin1_{juv}$  hemisphere: -0.010,  $p < 10^{-5}$ ; mean  
116 correlation of activity with running speed control hemisphere: 0.048,  $\Delta Grin1_{juv}$  hemisphere: 0.090,  $p <$   
117  $10^{-5}$ ; two-sample independent t-test). The overall distribution resembled the distribution we had  
118 observed previously in mice raised without coupling between running and visual flow (Attinger et al.,  
119 2017). We quantified this using the angle of the first principal component of the distribution relative  
120 to the axis defined by the correlation of activity with running speed. Similar to mice raised with  
121 coupling between running and visual flow, we found that in the control hemisphere the majority of  
122 neurons exhibited opposing signs of correlation with running and visual flow, which manifested as a  
123 principal component close to the negative diagonal. In the knockout hemisphere the distribution is  
124 shifted in the direction of that observed in mice raised without coupling between running and visual  
125 flow, where the principal component is rotated towards the positive diagonal (**Figure S1B**). These  
126 results are consistent with the interpretation that the NMDA receptor knockout interferes with the  
127 establishment of the balance between opposing top-down and bottom-up input in individual neurons.  
128 Lastly, consistent with the effect of systemic inhibition of NMDA receptors on correlations of L2/3  
129 neurons in V1 (**Figure S1D**) (Hamm et al., 2017), we found that in the knockout hemisphere the  
130 average pairwise correlation of neuronal activity was higher compared to that in the control

131 hemisphere (**Figure 1J**). Thus, NMDA receptor knockout prior to first visual experience prevents the  
132 development of normal visual and visuomotor mismatch responses in V1.

133 These results would be consistent with either a role of the NMDA receptor in the plasticity necessary  
134 for the establishment of visuomotor integration in V1, or a direct involvement of NMDA receptors in  
135 generating neuronal calcium responses. The latter could be driven by an influence of NMDA receptors  
136 on the overall excitability of the neurons, or, given that NMDA receptors conduct calcium, by directly  
137 reducing the calcium response. To disambiguate this, we repeated the same NMDA receptor knockout  
138 experiments in a second group of mice that had been reared in a normal light-dark cycle ( $\Delta Grin1_{adult}$ ;  
139 **Figure 1B**). We found that in these mice there was no difference in any of the responses between  
140 those in the control hemisphere and those in the knockout hemisphere (**Figures 2A-2C**). Consistent  
141 with the finding that pharmacological inhibition of NMDA receptors in adult mice results in an overall  
142 decrease of V1 activity (Ranson et al., 2019) (**Figure S1C**), we found a strong reduction in overall  
143 activity levels in the knockout hemisphere (**Figure 2D**). Consistent with a lack of an NMDA receptor  
144 knockout induced change in mismatch and visual responses, the distribution of visual flow and running  
145 correlations with activity in control and knockout hemispheres was very similar (**Figure 2E**). Lastly, as  
146 in the juvenile knockout, we found an increase in the average correlation between neurons (**Figure**  
147 **2F**). This increase in correlation is likely specific to L2/3 neurons, as a similar knockout in layer 4 (L4)  
148 neurons results in a decrease in correlation between neurons that lack NMDA receptors (Mizuno et  
149 al., 2021). This demonstrates that NMDA receptors are not necessary to maintain mismatch and visual  
150 responses once V1 is fully trained by visuomotor experience.

151 Both a visuomotor mismatch and the sudden appearance of a visual stimulus are unpredictable events  
152 and can be interpreted as negative and positive prediction errors, respectively. Assuming there is  
153 indeed a deficit in the development of prediction error responses induced by the NMDA receptor  
154 knockout, we would also expect a similar deficit in the suppression of predictable responses. To  
155 investigate this, we quantified the suppression of running onset responses by visual flow in the closed-  
156 loop session. In normally reared mice, a running onset with closed-loop visual feedback is typically  
157 associated with an increase in activity that is transient, whereas the response to the same running  
158 onset in darkness results in a sustained change in mean activity (**Figure 3A**). One interpretation of this  
159 is that the visual flow coupled to locomotion in the closed-loop session triggers a suppression of the  
160 running-related responses. We can quantify the suppression in the closed-loop session by taking the  
161 difference between the running onset response in darkness and that in the closed-loop session (**Figure**  
162 **3A**). Computing this difference for control mice,  $\Delta Grin1_{juv}$  mice, and  $\Delta Grin1_{adult}$  mice, we found that  
163 this suppression was absent only in the knockout hemisphere of the  $\Delta Grin1_{juv}$  mice (**Figures 3B and**

164 **3C).** This is consistent with an impairment in the suppression of predictable responses in L2/3 neurons  
165 by an NMDA receptor knockout prior to first visual experience.

166 **Local NMDA receptor dysfunction during development resulted in impaired visuomotor skill**  
167 **learning later in life.**

168 Assuming developmental plasticity is necessary for the establishment of normal visuomotor  
169 integration, we expected that the  $\Delta Grin1_{juv}$  mice would exhibit behavioral impairments in cortex-  
170 dependent visuomotor tasks. To test this, we trained 6  $\Delta Grin1_{juv}$  mice in a visuomotor task later in life.  
171 For these experiments we used two control groups. The first was composed of 13  $\Delta Grin1_{adult}$  mice, and  
172 the second was composed of 6 control mice (Control<sub>juv</sub>) that did not receive a *Grin1* knockout but were  
173 dark reared from birth. The  $\Delta Grin1_{juv}$  and Control<sub>juv</sub> groups were dark reared until P32. All three groups  
174 were initially exposed to closed-loop experience in a virtual reality setup as described above and  
175 subsequently trained to perform a virtual navigation task (Heindorf et al., 2018) (**Figures 4A and 4B**).  
176 In this task, mice had control over movement in a virtual environment through rotation and forward  
177 locomotion on a spherical treadmill and were trained to reach the end of a virtual corridor for a water  
178 reward. Training lasted for 7 days, 1 hour per day. We quantified performance using an index that is  
179 based on the fraction of distance traveled toward the target normalized by the total distance traveled  
180 (see Methods). The dark reared Control<sub>juv</sub> mice and the adult knockout  $\Delta Grin1_{adult}$  mice both learned  
181 to perform the task over the course of the training. The  $\Delta Grin1_{juv}$  mice, however, failed to show  
182 evidence of increased performance over the course of the 7 days of training, and exhibited  
183 significantly reduced performance compared to the two control groups late in training (**Figure 4C**). To  
184 test for the mice's ability to induce a behavioral response to an unexpected perturbation of visual  
185 feedback, we introduced sudden offsets of the current heading direction at random times by 30°  
186 either to the left or to the right. With training, mice learned to correct for these offset perturbations  
187 with a turn that corrected for the offset. Both Control<sub>juv</sub> and  $\Delta Grin1_{adult}$  mice corrected for offset  
188 perturbations with a compensatory turn in the correct direction by the end of training (**Figure 4D**).  
189 However, the  $\Delta Grin1_{juv}$  mice failed to correct for these offsets. Quantifying this as the learning related  
190 change in offset perturbation response, we found that Control<sub>juv</sub> and  $\Delta Grin1_{adult}$  mice both exhibit  
191 larger learning related changes than the  $\Delta Grin1_{juv}$  mice (**Figure 4E**). Thus, consistent with the  
192 dependence of normal visuomotor integration on NMDA receptors during first visuomotor  
193 experience, we found that mice that lack NMDA receptors during first visuomotor experience are  
194 impaired in learning certain cortex-dependent visually guided motor tasks later in life.

195 **CaMKII-dependent plasticity in SST interneurons was necessary for feed-forward visual inhibition.**

196 Central to the subtractive computation of prediction error responses are inhibitory interneurons. By  
197 implementing the opposing influence of visual and locomotion related input in L2/3 neurons (Jordan

198 and Keller, 2020), they allow for a subtraction of a bottom-up sensory input and a top-down prediction  
199 to compute prediction errors (Keller and Mrsic-Flogel, 2018). Based on measurements of calcium  
200 responses to visuomotor mismatches and artificial manipulations of activity in different interneuron  
201 subtypes, we have previously speculated that a subset of somatostatin (SST) positive interneurons  
202 mediates the visually driven inhibition necessary for negative prediction error responses in V1 L2/3  
203 excitatory neurons (Attinger et al., 2017). We thus set out to test whether an impairment of plasticity  
204 selectively in SST interneurons in V1 during first visuomotor experience would result in a failure to  
205 establish visually driven inhibition in L2/3 neurons. To do this, we turned to a method that would allow  
206 us to target the intervention to SST interneurons selectively in V1. We used a photoactivatable  
207 autocamide inhibitory peptide 2 (paAIP2) (Murakoshi et al., 2017) to inhibit calcium/calmodulin-  
208 dependent kinase II (CaMKII) using blue light illumination.

209 We repeated the experiments we performed with the NMDA receptor knockout (**Figures 1-3**) using  
210 paAIP2 in three groups of mice to target CaMKII inhibition either to excitatory neurons, SST  
211 interneurons (**Figure 5A**), or parvalbumin (PV) positive interneurons (**Figure S3A**). Again, all mice were  
212 dark reared from birth and received 2 hours of visuomotor experience in virtual reality environment  
213 every other day for 12 days (**Figures 5B and S3B**). The first group consisted of 6 C57/Bl6 mice that  
214 received an injection of an AAV to express paAIP2 under a CaMKII $\alpha$ (1.3kb)-promoter (AAV2/1-  
215 CaMKII $\alpha$ -mEGFP-P2A-paAIP2) in right V1. The other two groups consisted of 7 SST-Cre mice and 6 PV-  
216 Cre mice that each received an injection of AAV2/1-DIO-mEGFP-P2A-paAIP2 unilaterally in V1. At P30,  
217 prior to first visuomotor experience, mice were injected with an AAV to express a red-shifted calcium  
218 indicator (AAV2/1-Ef1 $\alpha$ -NES-jRGECO1a) in both visual cortices. To activate paAIP2 during visuomotor  
219 exposure while mice were on the virtual reality setup, we illuminated V1 bilaterally using a blue (473  
220 nm) laser, through the glass windows implanted for subsequent two-photon imaging (see Methods).  
221 As before (**Figures 1E-1G** and **Figures 2A-2C**), we then proceeded to measure mismatch, grating, and  
222 running onset responses in L2/3 neurons at P44. Similar to the responses observed in  $\Delta Grin1_{juv}$  mice,  
223 we found that with paAIP2 expressed under the CaMKII $\alpha$ (1.3kb)-promoter, the strongest changes  
224 were in mismatch and visual responses, while running onset responses were less affected (**Figures 5C-**  
225 **5E**). Mismatch responses were again reduced in the inhibited hemisphere compared to the control  
226 hemisphere (**Figure 5C**). Intriguingly, CaMKII inhibition resulted in a massive increase in visually driven  
227 activity of L2/3 neurons (**Figure 5D**). We speculate that this difference can be explained by the fact  
228 that the power of light used to activate paAIP2 falls off exponentially with cortical depth (**Figure S2A**)  
229 and that CaMKII inhibition predominantly influences superficial synapses, which preferentially carry  
230 top-down signals (see Discussion). Despite the difference in the effect of the manipulation on visually

231 driven responses, the effect of the CaMKII inhibition on correlations between the activity of L2/3  
232 neurons was an increase, similar to that observed in the  $\Delta Grin1_{juv}$  mice (**Figure S2B**).

233 Given the differences between  $\Delta Grin1_{juv}$  and the CaMKII inhibition in excitatory neurons, we compared  
234 the effect of CaMKII inhibition in inhibitory interneurons to that observed when inhibiting CaMKII in  
235 excitatory neurons. Inhibiting CaMKII in SST interneurons had an effect similar to the one we found  
236 when inhibiting CaMKII in excitatory neurons, decreasing mismatch responses and increasing visual  
237 responses (**Figures 5F-5H**). Interestingly, the running onset responses during the closed-loop session  
238 were much larger in the inhibited hemisphere (**Figure 5H**). This could be explained by an increased  
239 motor-related excitatory input, a decreased bottom-up visual inhibition, or a combination of both.  
240 Assuming SST interneurons mediate visually driven inhibition, and the establishment of this inhibition  
241 is experience dependent, we would expect that the CaMKII inhibition in SST interneurons results in  
242 decreased visually driven inhibition onto L2/3 neurons. To test this, we quantified the average  
243 correlation between neuronal activity and visual flow speed in open-loop sessions. Under normal  
244 conditions, this correlation is negative for L2/3 excitatory neurons (**Figure 6A**). The correlation became  
245 more strongly negative with the inhibition of CaMKII in excitatory neurons but became positive with  
246 the inhibition of CaMKII in SST interneurons. This positive shift in the correlation with visual flow is  
247 consistent with a decrease in visually driven inhibition by the paAIP2 inhibition of CaMKII in SST  
248 interneurons. To test whether this effect is specific to SST interneurons or simply the consequence of  
249 altering inhibition, we repeated the experiments in PV-Cre mice. Consistent with a role of PV  
250 interneurons in modulating cortical gain (Atallah et al., 2012), inhibiting CaMKII in PV interneurons  
251 resulted in a uniform increase in all response types (**Figures S3C-S3E**), but did not lead to a net positive  
252 correlation of neural activity with visual flow in excitatory neurons (**Figure 6A**). Moreover, comparing  
253 the average visual flow correlation across all manipulations, we found that only the inhibition of  
254 CaMKII in SST interneurons resulted in a net positive correlation of neural activity with visual flow in  
255 excitatory neurons. Thus, plasticity in SST interneurons is likely central to establishing normal levels of  
256 visually driven inhibition in V1.

257 To test if normal visuomotor experience without inhibition of CaMKII would revert the changes we  
258 observed, we returned the mice to dark housing for 2 days following the first imaging session and  
259 repeated the neuronal activity measurements. At the time of the second measurement, the only visual  
260 experience without inhibition of CaMKII the mice had experienced was approximately 15 min of  
261 closed-loop visual feedback, 30 min of open-loop visual feedback, and 15 min of grating stimuli of the  
262 first imaging session. We found that after this one hour of visual experience, most of the CaMKII  
263 inhibition induced effects had either significantly reduced or reverted. For mice with inhibition of  
264 CaMKII in excitatory neurons or SST interneurons, mismatch responses in the inhibited hemisphere



265 were larger on the 2<sup>nd</sup> day of imaging than on the first day of imaging (**Figures S4A and S4D**), while  
266 grating onset responses were significantly reduced compared to the first day of imaging (**Figures S4B**  
267 **and S4E**). Running onset responses in the closed-loop sessions on the 2<sup>nd</sup> day of imaging were  
268 decreased in the inhibited hemisphere compared to those on the first day of imaging (**Figures S4C and**  
269 **S4F**) and the correlation of neuronal activity with visual flow became negative in the mice that had  
270 originally received CaMKII inhibition in SST interneurons (**Figure S4G**). Thus, normal visuomotor  
271 coupling in absence of CaMKII inhibition allowed the circuit to revert towards the control state.  
272 Together, these data are consistent with the interpretation that plasticity both in the top-down input  
273 to L2/3 as well as the visually driven inhibition mediated by SST interneurons is necessary to establish  
274 the L2/3 circuit underlying the computation of visuomotor prediction errors.

## 275 **DISCUSSION**

276 Our results demonstrate that with first visual experience in the life of a mouse, exposure to  
277 visuomotor coupling establishes a circuit in V1 capable of integrating motor and visual signals that  
278 enables visuomotor skill learning later in life. Given that the block of NMDA-receptor-dependent  
279 plasticity resulted in a reduction of responses in L2/3 neurons to mismatch and visual stimuli, we  
280 speculate that the observed impairment in visuomotor skill learning is the consequence of a reduced  
281 capacity of V1 to compute visuomotor prediction errors. Considering that L2/3 excitatory neurons  
282 balance opposing bottom-up and top-down input (Jordan and Keller, 2020), our results indicate that  
283 this balance is established by local plasticity in V1 through experience with visuomotor coupling early  
284 in life. We find that preventing this process from occurring in V1 during visuomotor development  
285 impairs the ability of mice to learn visuomotor tasks later in life. Thus, we speculate that the ability of  
286 V1 to compute visuomotor prediction errors is an essential component of the computational strategy  
287 the brain uses to guide movement by visual feedback in complex behavioral tasks. Interestingly, later  
288 in life, plasticity in V1 is no longer necessary for visuomotor skill learning, indicating that most of the  
289 learning related plasticity occurs outside of V1 or independent of NMDA receptors.

290 When interpreting our results, it should be kept in mind that our strategy to knock out NMDA  
291 receptors in V1 is not specific to L2/3 neurons, and we cannot be certain if the effects we observed in  
292 L2/3 neurons are the direct consequence of the NMDA receptor knockout in these neurons or a  
293 downstream consequence of an effect in another layer. It has been demonstrated, however, that a  
294 knockout of NMDA receptors in L4 neurons, the main source of bottom-up visual input to L2/3  
295 neurons, does not alter visually evoked potentials in visual cortex, nor does it impair visual acuity of  
296 the mice, regardless of whether the knockout is congenital or postadolescent (Fong et al., 2020;  
297 Sawtell et al., 2003). Thus, we speculate that the NMDA receptor knockout effects we observe are at

298 least in part driven by interfering with the establishment of normal input to the L2/3 neurons in V1.  
299 Another potential confound of these experiments is that we are using intracellular calcium  
300 concentration changes to measure neuronal activity, when the NMDA receptor channel is permeable  
301 to calcium and constitutes the main source of calcium in dendritic spines (Sabatini et al., 2002).  
302 However, given that we are measuring calcium signals at the soma where the main source of calcium  
303 is voltage-gated calcium channels (Grienberger and Konnerth, 2012), the direct effect of the NMDA  
304 receptor knockout on intracellular calcium is unlikely to interfere with our conclusions. Moreover, an  
305 overall reduction in calcium would influence all responses equally and would not explain why after  
306 NMDA receptor knockout, we find a strong reduction in mismatch and visual responses but only a  
307 small reduction in mean activity levels in juvenile mice (**Figure 1**), while in adult mice the converse is  
308 true (**Figure 2**).

309 There is a marked difference between the NMDA receptor knockout results and the CaMKII inhibition  
310 results in that the latter led to a massive increase in visual responses. There are a number of possible  
311 explanations that could account for this difference. First, despite the fact that NMDA receptors and  
312 CaMKII are closely linked in many forms of synaptic plasticity, there could be a systematic difference  
313 in the dependence of plasticity on the two molecules as a function of neuron or synapse type. Second,  
314 while the NMDA receptor knockout is permanent, we only inhibit CaMKII during the 2 hours of  
315 visuomotor exposure. Outside of this time, when the mice were housed in darkness, there could have  
316 been forms of compensatory plasticity in V1 in response to visuomotor experience driven plasticity  
317 outside of V1. Third, as the inhibition of CaMKII is driven by blue light illumination on the cortical  
318 surface, there could be a systematic difference in which synapses, or neurons, are influenced by the  
319 manipulation. The power of the light used to activate paAIP2 falls off exponentially with cortical depth  
320 with an estimated decay constant of between 35  $\mu\text{m}$  and 97  $\mu\text{m}$  (**Figure S2A**), consistent with previous  
321 findings (Yona et al., 2016). This, combined with the fact that CaMKII expression is higher in superficial  
322 L2/3 neurons than L4 and L5 neurons (Lein, 2007; Tighilet et al., 1998), could result in an increased  
323 effect of the CaMKII inhibition in superficial synapses. Long-range cortical input, which is thought to  
324 carry motor-related input to V1 (Leinweber et al., 2017), arrives preferentially on more superficial  
325 synapses than the bottom-up visual input (Park et al., 2019; Petreanu et al., 2009; Young et al., 2021).  
326 Thus, the differences in effect on grating responses between the NMDA receptor knockout and the  
327 CaMKII inhibition could be explained by a differential influence on top-down and bottom-up pathways.  
328 While we cannot exclude the involvement of the other potential explanations discussed above, it is  
329 not immediately clear why they would result in a differential effect with regards to positive and  
330 negative prediction errors. Thus, we speculate that the CaMKII inhibition results in a differential  
331 impairment of plasticity in top-down and bottom-up pathways.

332 It is important to note that the within animal control suffers from the confound that the two  
333 hemispheres are directly connected. For instance, the fact that visual responses are also massively  
334 increased in the control hemisphere of mice in which we inhibited CaMKII in excitatory neurons  
335 relative to the level of responses one would expect normally (e.g., compare **Figure 5D** with **Figure 2B**,  
336 or (Attinger et al., 2017)), is likely caused by this direct interaction. A similar problem befalls our  
337 experiments using the NMDA receptor knockout. However, given that the effect sizes were  
338 considerably smaller in those experiments, crosstalk effects are likely also less salient.

339 Lastly, given that little is known about the role of CaMKII in the plasticity in interneurons, it was not *a*  
340 *priori* clear that blocking CaMKII in SST or PV interneurons during visuomotor development would  
341 have a measurable influence on L2/3 excitatory neuron responses. While CaMKII $\alpha$  is mainly expressed  
342 in excitatory neurons in cortex, CaMKII $\beta$  is found in both excitatory and inhibitory neurons (Nicole and  
343 Pacary, 2020). Given that paAIP2 is designed based on a sequence of the autoinhibitory domain of  
344 CaMKII (Hanson et al., 1989) that is highly conserved across isoforms (Tobimatsu and Fujisawa, 1989),  
345 and inhibits CaMKII at the kinase domain (Murakoshi et al., 2017), which is also highly conserved  
346 across isoforms (Tobimatsu and Fujisawa, 1989), paAIP2 inhibition is likely independent of CaMKII  
347 isoform. Thus, our results would be consistent with the interpretation that SST and PV interneurons  
348 exhibit CaMKII $\beta$ -dependent forms of plasticity necessary for the establishment of normal visuomotor  
349 integration in V1. Supporting this interpretation is the fact that inhibiting CaMKII in SST interneurons  
350 has an effect on net visual drive opposite to that of the same inhibition in excitatory neurons (**Figure**  
351 **6A**). Consistent with the previous finding that SST activity is critical for the computation of visuomotor  
352 mismatch responses (Attinger et al., 2017), the role of SST interneurons appears to be critical to  
353 establishing a balance between top-down and bottom-up input in L2/3 neurons in V1. This is in line  
354 with the findings that the activity of SST interneurons is modulated by locomotion only in the presence  
355 of visual input (Pakan et al., 2016), and that in excitatory neurons, inputs from both excitatory neurons  
356 and SST interneurons, but not PV or vasoactive intestinal peptide (VIP)-expressing interneurons,  
357 exhibit NMDA receptor-dependent plasticity (Chiu et al., 2018). Thus, we postulate that visuomotor  
358 experience establishes a balance in individual L2/3 neurons, either between top-down excitatory input  
359 and visually driven inhibition mediated by SST interneurons, or top-down inhibition - possibly also  
360 mediated by SST interneurons - and visually driven excitation (**Figure 6B**).

361 **ABBREVIATIONS**

|     |        |                                                                            |
|-----|--------|----------------------------------------------------------------------------|
| 362 | CaMKII | Calcium/calmodulin-dependent protein kinase II                             |
| 363 | Grin1  | Glutamate receptor ionotropic NMDA subunit 1                               |
| 364 | L2/3   | Layer 2/3 of cortex                                                        |
| 365 | L4     | Layer 4 of cortex                                                          |
| 366 | L5     | Layer 5 of cortex                                                          |
| 367 | NMDA   | N-Methyl-D-aspartate                                                       |
| 368 | paAIP2 | photoactivatable autocamtide inhibitory peptide 2 (an inhibitor of CaMKII) |
| 369 | PV     | Parvalbumin                                                                |
| 370 | SEM    | Standard error of the mean                                                 |
| 371 | SST    | Somatostatin                                                               |
| 372 | V1     | Primary visual cortex                                                      |
| 373 |        |                                                                            |

374 FIGURES

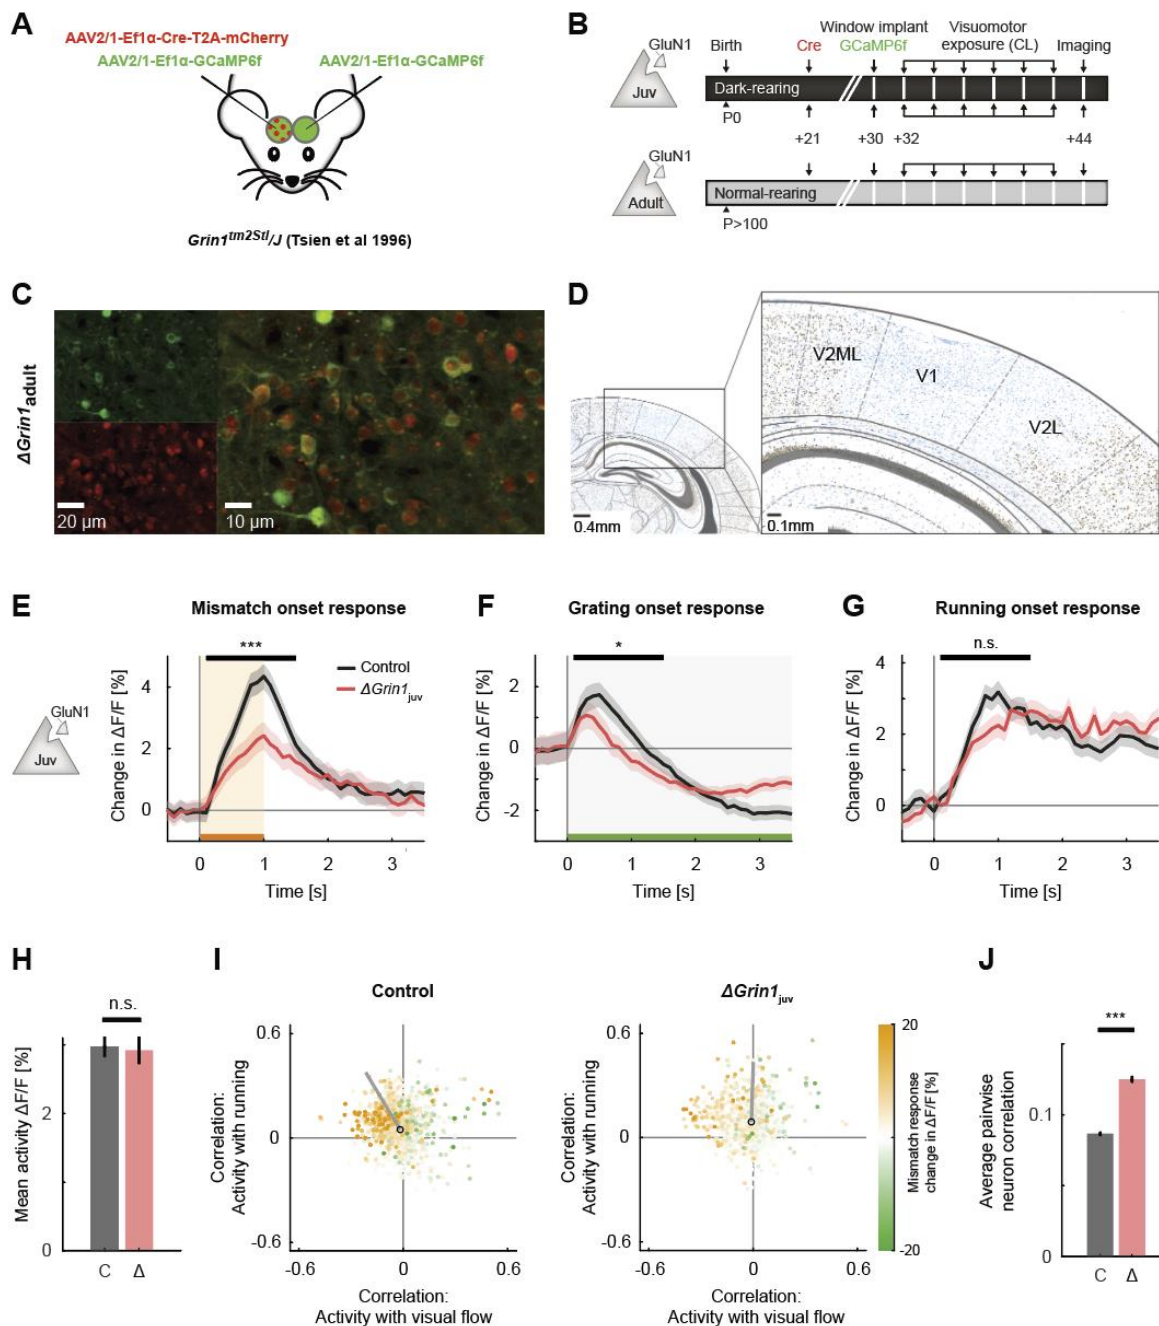

375

376 **Figure 1. NMDA receptor knockout prior to first visual experience impaired the development of**  
377 **normal visual and mismatch responses.**

378 (A) We injected an AAV to express Cre recombinase unilaterally and another to express a calcium  
379 indicator bilaterally (GCaMP6f) in V1 of  $\Delta Grin1$  mice prior to first visual experience.

380 (B) Experimental timeline: a first group of mice ( $\Delta Grin1_{juv}$ ) was dark reared from birth. We injected an  
381 AAV to express Cre at P21 unilaterally in V1, injected a second AAV to express GCaMP6f bilaterally,  
382 and implanted imaging windows bilaterally at P30. A second group of mice ( $\Delta Grin1_{adult}$ ) was reared  
383 normally and received the same injections at P>100. All mice then had 6 sessions of visuomotor  
384 exposure in a closed-loop (CL) virtual environment before imaging experiments.

385 (C) Example two-photon images showing co-expression of GCaMP6f and Cre-mCherry constructs.

386 (D) In situ hybridization against *Grin1* mRNA (see Methods) confirming the local knockout of *Grin1* in  
387 V1. Blue: Hematoxylin stain for cell nuclei; brown: *Grin1* hybridization signal. Brain regions were  
388 identified using a mouse brain atlas (Franklin and Paxinos, 2012).

389 (E) The average population response (stimulus induced change in  $\Delta F/F$ ) to mismatch was stronger in  
390 control (black) than in  $\Delta Grin1_{juv}$  (red) hemispheres. Shading indicates standard error of the mean  
391 (SEM) across neurons. Orange shading and bar indicate duration of mismatch. Mean responses were  
392 compared across neurons in the time window indicated by the black bar above the traces. Here and  
393 in subsequent panels, n.s.:  $p > 0.05$ , \*:  $p < 0.05$ , \*\*:  $p < 0.01$ , \*\*\*:  $p < 0.001$ . For all details of statistical  
394 testing, see **Table S1**.

395 (F) As in E, but for drifting grating responses (see Methods). Green shading and bar indicate presence  
396 of a grating stimulus.

397 (G) As in E, but for running onset responses in closed-loop sessions.

398 (H) Mean calcium activity of neurons in the control (C, gray) and  $\Delta Grin1_{juv}$  ( $\Delta$ , red) hemisphere during  
399 the closed-loop session. Error bars indicate SEM across neurons.

400 (I) Scatter plot of the correlation between neuronal activity and visual flow, and the correlation  
401 between neuronal activity and running speed in open-loop sessions for all L2/3 neurons recorded in  
402 control (left) and  $\Delta Grin1_{juv}$  (right) hemispheres. Each dot shows the correlations for one neuron, and  
403 dot color indicates the neuron's mismatch response. Black circles mark the population mean, and solid  
404 black lines indicate the direction of the first principal component of the distribution (see **Figure S1B**  
405 and Methods).

406 (J) Average pairwise correlation of neuronal activity was higher in  $\Delta Grin1_{juv}$  ( $\Delta$ , red) compared to that  
407 in the control (C, black) hemisphere. Error bars indicate SEM across neurons.

408

409

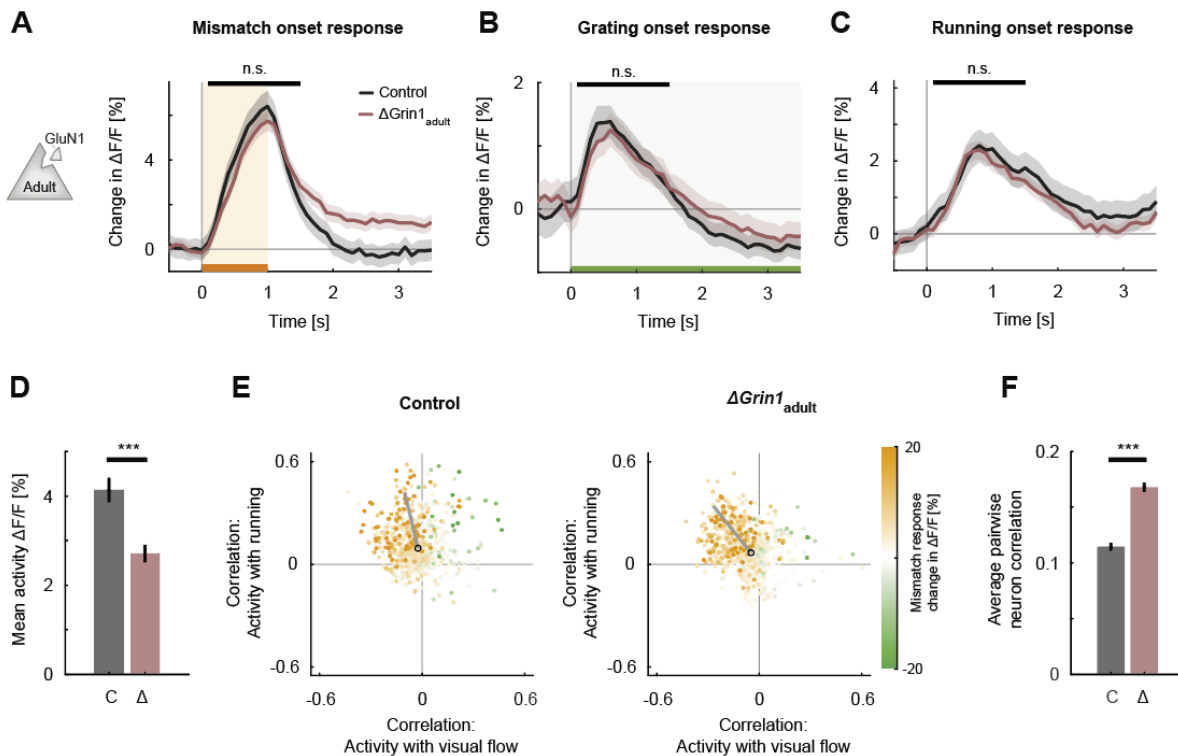

410

411 **Figure 2. NMDA receptor knockout in the adult mouse did not impair visual and visuomotor**  
 412 **responses.**

413 (A) The average population response to mismatch was similar in control (black) and in  $\Delta Grin1_{adult}$  (dark  
 414 red) hemispheres. Shading indicates SEM across neurons. Orange shading and bar indicate duration  
 415 of mismatch. Mean responses were compared across neurons in the time window indicated by the  
 416 black bar above the traces. Here and in subsequent panels, n.s.:  $p > 0.05$ , \*:  $p < 0.05$ , \*\*:  $p < 0.01$ , \*\*\*:  
 417  $p < 0.001$ . For all details of statistical testing, see **Table S1**.

418 (B) As in A, but for responses to the onset of a drifting grating stimulus (see Methods). Green shading  
 419 and bar indicate presence of grating stimulus.

420 (C) As in A, but for running onset responses in closed-loop sessions.

421 (D) Mean activity of neurons in the control (C, gray) and  $\Delta Grin1_{adult}$  ( $\Delta$ , dark red) hemisphere during  
 422 the closed-loop session. Error bars indicate SEM across neurons.

423 (E) Scatter plot of the correlation between neuronal activity and visual flow, and the correlation  
 424 between neuronal activity and running speed in open-loop sessions for all L2/3 neurons recorded in  
 425 in control (left) and  $\Delta Grin1_{adult}$  (right) hemispheres. Each dot shows the correlations for one neuron,  
 426 and dot color indicates the neuron's mismatch response. Black circles mark the population mean, and  
 427 solid black lines indicate the direction of the first principal component of the distribution (see  
 428 Methods).

429 (F) Average pairwise correlation of neuronal activity was higher in  $\Delta Grin1_{adult}$  ( $\Delta$ , dark red) compared  
 430 to that in the control (C, black) hemisphere. Error bars indicate SEM across neurons.

431

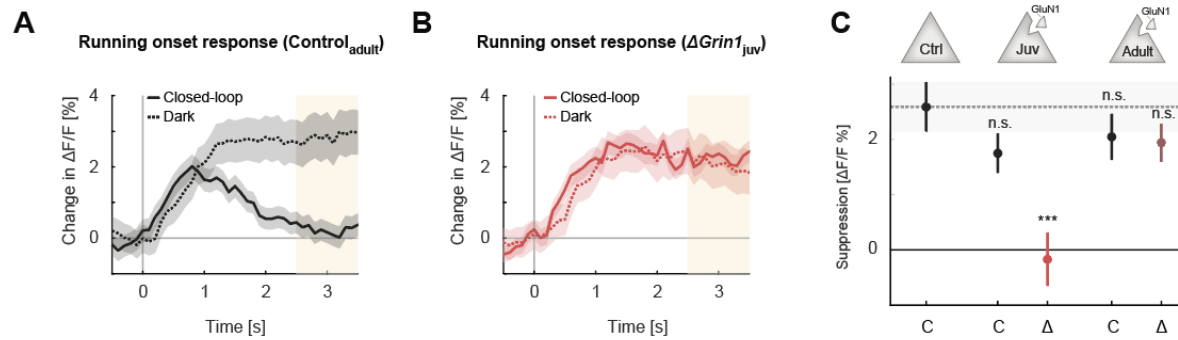

432

433 **Figure 3. Suppression of running onset responses by visual flow was reduced by an NMDA receptor**  
 434 **knockout prior to first visual experience.**

435 (A) The average population response to running onset in closed-loop sessions (solid) and dark sessions  
 436 (dotted) in adult control mice. Shading indicates SEM across neurons. Albescent white shading marks  
 437 analysis window used in C. Note, the visual flow associated with closed-loop running results in a  
 438 suppression of motor-related responses.

439 (B) As in A, but for  $\Delta Grin1_{juv}$  data in the knockout hemisphere.

440 (C) Average closed-loop visual feedback induced suppression of activity for all neurons in adult control  
 441 mice and control (C) or knockout ( $\Delta$ ) hemispheres of  $\Delta Grin1_{juv}$  and  $\Delta Grin1_{adult}$  mice. Suppression is  
 442 calculated as the difference between the running onset response in dark and closed-loop session in  
 443 the window 2.5 s to 3.5 s after running onset, marked in A and B. Error bars indicate SEM across  
 444 neurons. Comparison against data from control mice; n.s.:  $p > 0.05$ , \*\*\*:  $p < 0.001$ . For all details of  
 445 statistical testing, see Table S1.



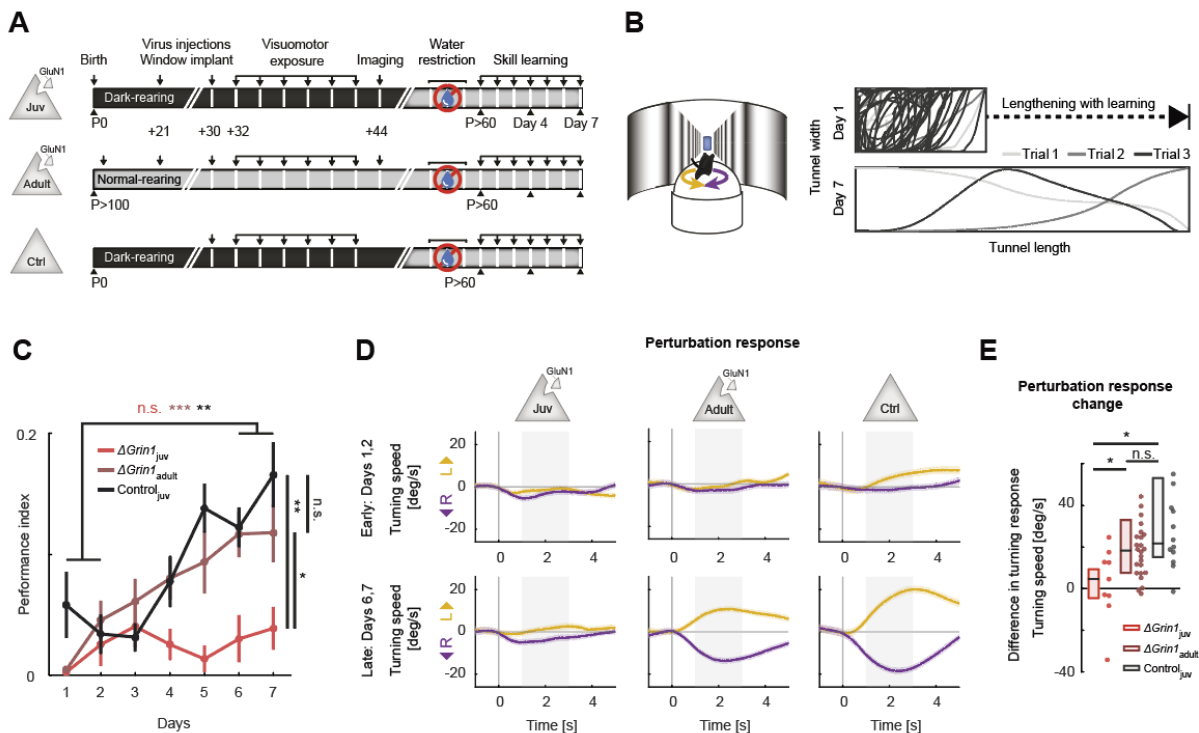

446

447 **Figure 4. NMDA receptor knockout in V1 before first visuomotor experience impaired learning of a**  
 448 **visuomotor task later in life.**

449 (A) Experimental approach and timeline. Three groups of mice were trained: the first was composed  
 450 of 6  $\Delta Grin1_{juv}$  dark reared mice, the second was composed of 13  $\Delta Grin1_{adult}$  normally reared mice, and  
 451 the third was composed of 6 C57/BL6 dark reared control mice. Mice were water restricted and  
 452 subsequently trained to perform a virtual navigation task (see Methods).

453 (B) Left: Schematic of virtual reality setup. Mice controlled forward translational motion and rotation  
 454 in a virtual corridor by rotating a spherical treadmill and were trained to navigate to the end of a  
 455 corridor for a water reward. As performance increased, the task difficulty was increased by  
 456 lengthening the virtual corridor. Right: Top-down view of the virtual corridor showing the trajectories  
 457 of the mouse in three example trials (different gray levels) on day 1 (top) and day 7 (bottom). The ratio  
 458 of virtual corridor length to width is not to scale.

459 (C) Task performance as a function of training day (see Methods) of  $\Delta Grin1_{juv}$  mice (red),  $\Delta Grin1_{adult}$   
 460 mice (dark red), and dark reared control mice ( $Control_{juv}$ , black) over the course of 7 days. Error bars  
 461 indicate SEM across mice.  $\Delta Grin1_{adult}$  and  $Control_{juv}$  mice exhibited performance improvements over  
 462 the course of training, while  $\Delta Grin1_{juv}$  mice did not (comparing average performance on day 1 and 2  
 463 (early), vs average performance on day 6 and 7 (late)). Performance on day 7 was different between  
 464  $\Delta Grin1_{juv}$  and both  $\Delta Grin1_{adult}$  and  $Control_{juv}$  mice. Here and in subsequent panels, n.s.:  $p > 0.05$ , \*:  $p <$   
 465  $0.05$ , \*\*:  $p < 0.01$ , \*\*\*:  $p < 0.001$ . For all details of statistical testing, see **Table S1**.

466 (D) Turning response behavior (rotational velocity) following a sudden heading displacement of  $30^\circ$   
 467 (perturbation) to the left (yellow) or right (purple) of  $\Delta Grin1_{juv}$ ,  $\Delta Grin1_{adult}$  and  $Control_{juv}$  mice, early  
 468 (top row) and late (bottom row) in training. Shading indicates SEM across trials. Gray shading indicates  
 469 analysis window (+1 s to +3 s) used for quantification in E.

470 (E) Quantification of perturbation offset responses shown in D as the difference between average  
 471 left and right perturbation turning responses, late (bottom row in D) minus early (top row in D) in  
 472 training. Boxes show median and quartiles, all data (averages over mice) are shown as dots to the

473 right.  $\Delta Grin1_{adult}$  and Control<sub>juv</sub> mice learned to initiate corrective turns in response to visual offset  
474 perturbations, while  $\Delta Grin1_{juv}$  mice did not.

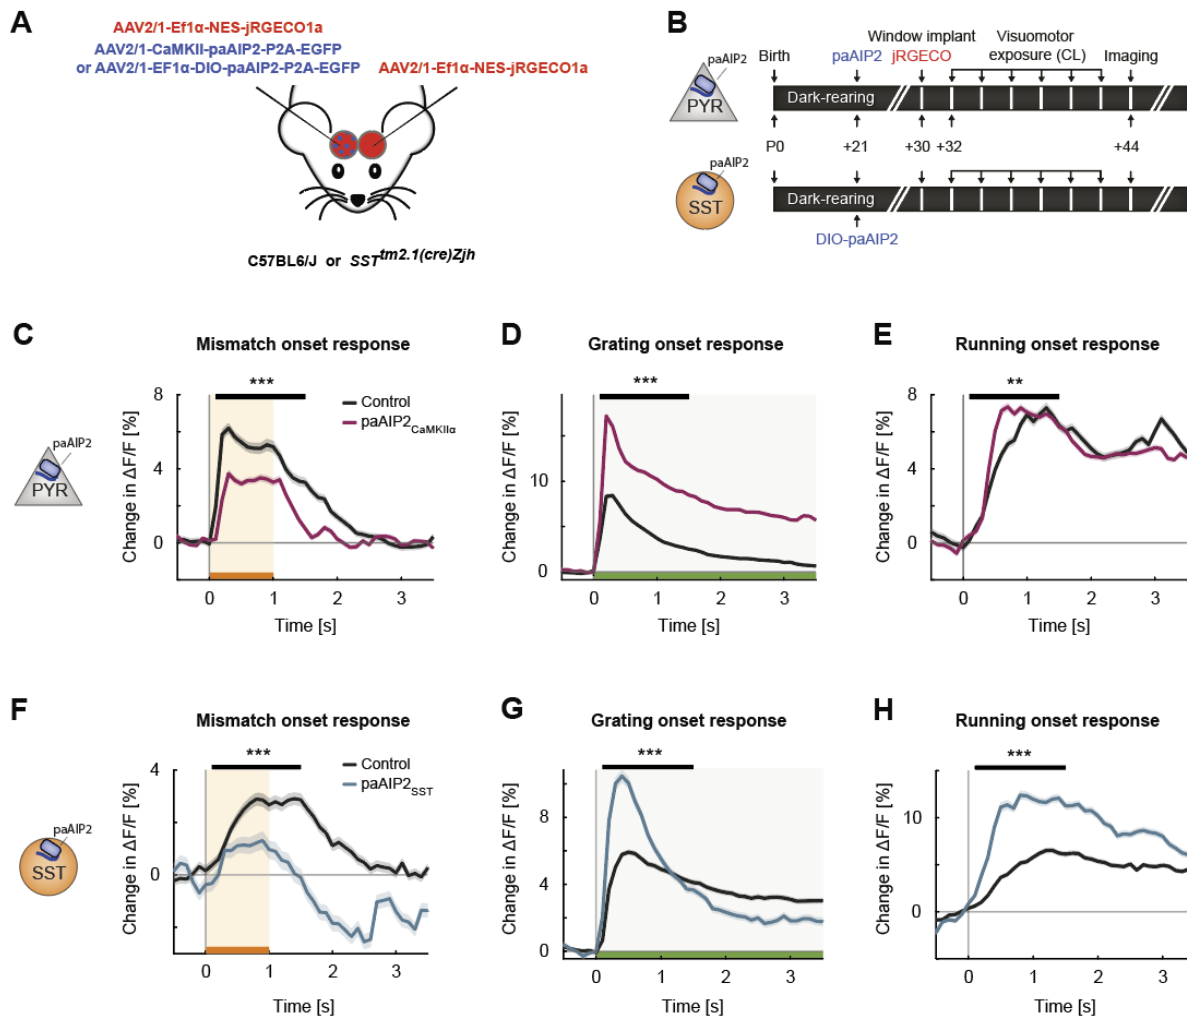

475

476 **Figure 5. Inhibiting CaMKII in excitatory neurons or SST interneurons resulted in imbalanced**  
 477 **visuomotor responses in L2/3 excitatory neurons.**

478 (A) We unilaterally injected an eGFP-tagged paAIP2 or DIO-paAIP2 expressing virus and a calcium  
 479 indicator (jRGECO1a) bilaterally in V1.

480 (B) Mice were dark reared from birth. AAV injections occurred at postnatal day 21 (to deliver paAIP2  
 481 or DIO-paAIP2) and P30 (to deliver jRGECO1a). Imaging window implantation occurred on P30. Mice  
 482 had 6 sessions of visuomotor exposure in a closed-loop virtual environment during which we  
 483 illuminated cortex bilaterally with blue light (473 nm) to inhibit CaMKII. We used of 6 C57/Bl6J mice,  
 484 in which paAIP2 was targeted to excitatory neurons using a CaMKII $\alpha$ (1.3kb) promoter (paAIP2<sub>CaMKII $\alpha$</sub> ),  
 485 and 7 SST-Cre mice that received an injection of the DIO-paAIP2 vector (paAIP2<sub>SST</sub>).

486 (C) The average population response to mismatch was stronger in control (black) than in paAIP2<sub>CaMKII $\alpha$</sub>   
 487 (purple) hemispheres. Shading indicates SEM across neurons. Orange shading and bar indicate  
 488 duration of mismatch. Mean responses were compared across neurons in the time window marked  
 489 by the black bar above the traces. Here and in subsequent panels, n.s.:  $p > 0.05$ , \*:  $p < 0.05$ , \*\*:  $p <$   
 490  $0.01$ , \*\*\*:  $p < 0.001$ . For all details of statistical testing, see **Table S1**.

491 (D) As in C, but for responses to the onset of a drifting grating stimulus (see Methods). Green shading  
 492 and bar indicate presence of grating stimulus.

493 (E) As in C, but for running onset responses in closed-loop sessions.

- 494    **(F)** As in **C**, but for inhibition of CaMKII in SST interneurons.
- 495    **(G)** As in **D**, but for inhibition of CaMKII in SST interneurons.
- 496    **(H)** As in **E**, but for inhibition of CaMKII in SST interneurons.

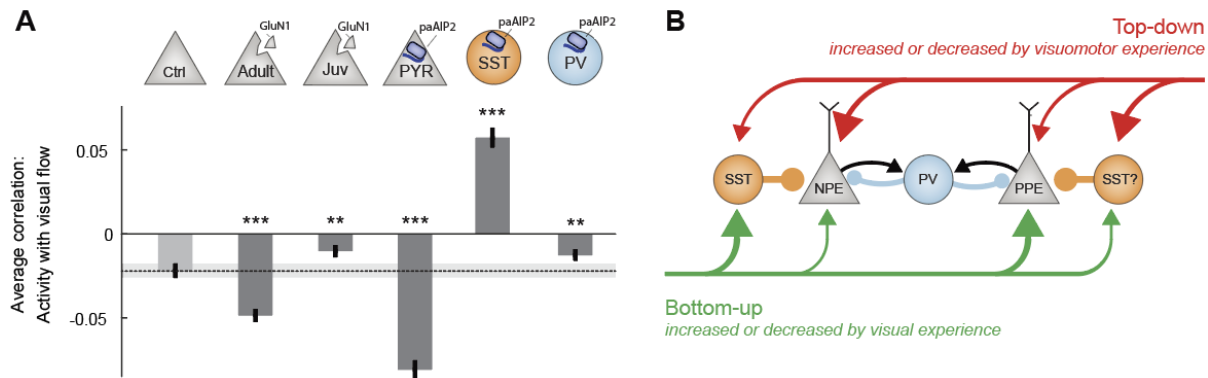

497

498 **Figure 6. CaMKII inhibition in SST interneurons during first visuomotor experience reduced visually**  
 499 **driven inhibition.**

500 (A) Mean correlation between neuronal activity and visual flow in open-loop sessions for all L2/3  
 501 excitatory neurons recorded in adult control,  $\Delta Grin1_{adult}$ ,  $\Delta Grin1_{juv}$ ,  $paAIP2_{CaMKII\alpha}$ ,  $paAIP2_{SST}$  and  
 502  $paAIP2_{PV}$  mice. Error bars indicate SEM across neurons. Dashed line (black) indicates mean correlation  
 503 of activity and visual flow of the adult control group; gray shading indicates SEM across neurons.  
 504 Comparison against adult control data: n.s.:  $p > 0.05$ , \*\*:  $p < 0.01$ , \*\*\*:  $p < 0.001$ . For all details of  
 505 statistical testing, see **Table S1**.

506 (B) Through visuomotor experience, local plasticity in V1 establishes a balance between top-down and  
 507 bottom-up input in L2/3 neurons (Jordan and Keller, 2020), that is thought to drive prediction error  
 508 responses. In this model, we refer to neurons that receive strong bottom-up excitation and strong top-  
 509 down inhibition as positive prediction error (PPE) neurons, while those with strong top-down  
 510 excitation and strong bottom-up inhibition, we refer to as negative prediction error (NPE) neurons.  
 511 Given that interfering with plasticity in either excitatory neurons or SST interneurons prevents normal  
 512 development of visual responses in excitatory neurons, combined with the finding that visual  
 513 responses in neither population of neurons depend on coupled visuomotor experience (Attinger et  
 514 al., 2017), we conclude that visual experience is necessary and sufficient for shaping visual inputs onto  
 515 both populations of neurons. As mismatch responses in excitatory neurons depend on visuomotor  
 516 experience and are sensitive to blocking plasticity in excitatory neurons, the proper wiring of top-down  
 517 input onto L2/3 excitatory neurons likely requires coupled visuomotor experience. SST interneurons  
 518 likely mediate visually driven inhibition, and we speculate that they also mediate the top-down motor-  
 519 related inhibition. The effect of interfering with plasticity in PV interneurons is consistent with the idea  
 520 that they regulate overall gain of the circuit.

521 SUPPLEMENTARY FIGURES

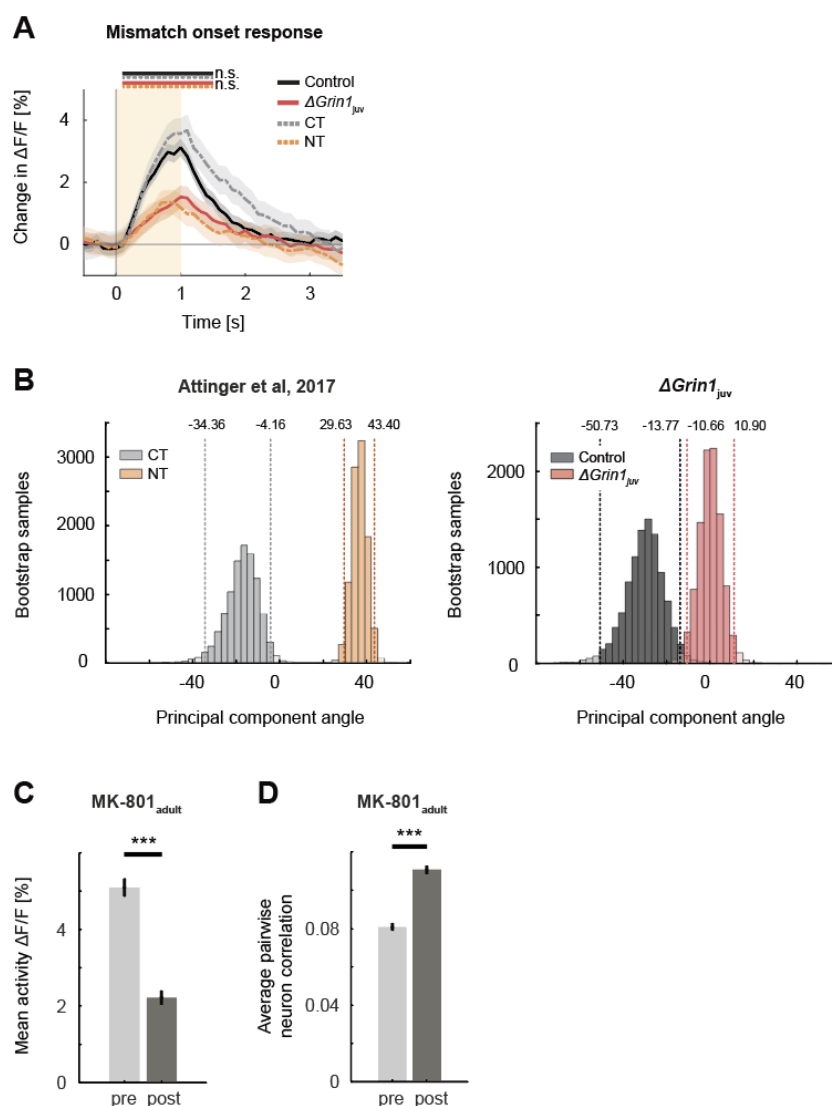

522

523 **Figure S1. The effect of the NMDA receptor knockout was comparable to the lack of experience with**  
 524 **visuomotor coupling and systemic block of NMDA receptors. Related to Figure 1.**

525 (A) Mean population response to mismatch in  $\Delta Grin1_{juv}$  (red) hemisphere, the control hemisphere  
 526 (black), coupled trained controls (CT, dashed gray), and mice raised without visuomotor coupling (non-  
 527 coupled trained (NT), orange). Responses in  $\Delta Grin1_{juv}$  are similar to those in NT mice, and those in the  
 528 control hemisphere were similar to those in CT mice. Note, the data shown in this figure includes all  
 529 data, while the data shown in **Figure 1E** includes only those data from recording sites for which we  
 530 also had sufficient grating and running onset data (see Methods). Here and in subsequent panels, n.s.:  
 531  $p > 0.05$ , \*:  $p < 0.05$ , \*\*:  $p < 0.01$ , \*\*\*:  $p < 0.001$ . For all details of statistical testing, see **Table S1**.

532 (B) Bootstrap distribution of principal component angles from correlational analysis of neuronal  
 533 activity with running speed and visual flow. Data shown are from coupled trained (CT, dashed gray)  
 534 and non-coupled trained (NT, dashed orange) mice from (Attinger et al., 2017), and for  $\Delta Grin1_{juv}$  (solid  
 535 red) and control hemisphere (solid black) data.

536 **(C)** Mean activity of L2/3 neurons in V1 before (pre, light gray) and 1 hour after (post, dark gray) intra-  
537 peritoneal injection of the NMDA receptor antagonist MK-801 (0.1 mg/kg). Error bars indicate SEM  
538 across neurons.

539 **(D)** Average pairwise correlation of neuronal activity was higher 1 hour after MK-801 injection (post,  
540 dark gray) compared to pre injection. Error bars indicate SEM across neurons.

541

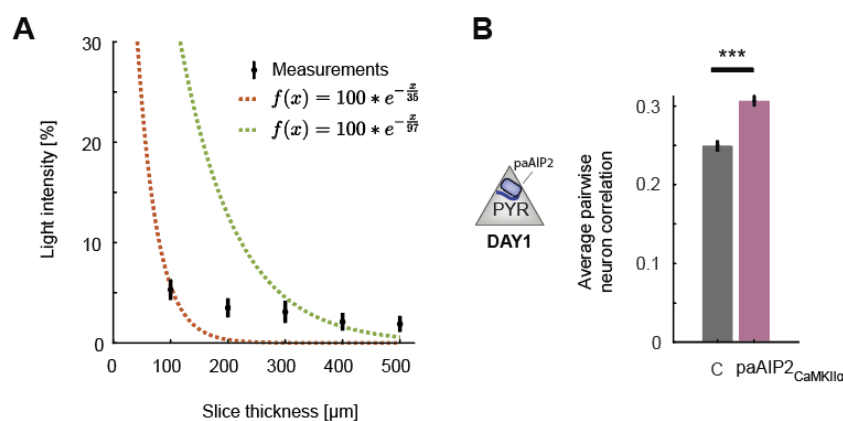

542

543 **Figure S2. Additional data of CaMKII inhibition in excitatory or SST inhibitory neurons. Related to**  
544 **Figure 5.**

545 **(A)** Percentage of blue light (473 nm) power transmitted through acute slices of cortical tissue of  
546 varying thickness. Shown in black are mean and standard deviation over 6 measurements. The dashed  
547 red line is a least squares exponential fit with a decay constant of 37  $\mu\text{m}$ , and the green line is the  
548 transform of a least squares linear fit to the log-transformed data with a decay constant of 97  $\mu\text{m}$ .  
549 Note, the data are not well fit by an exponential decay likely as a result of the point illumination. See  
550 (Yona et al., 2016) for detailed modelling of power decay.

551 **(B)** Average pairwise correlation of neuronal activity is higher in CaMKII inhibited excitatory neurons  
552 (purple), compared to that in the uninhibited control hemisphere (black). Error bars indicated SEM.  
553 Here and in subsequent panels, n.s.:  $p > 0.05$ , \*:  $p < 0.05$ , \*\*:  $p < 0.01$ , \*\*\*:  $p < 0.001$ . For all details of  
554 statistical testing, see **Table S1**.

555



556

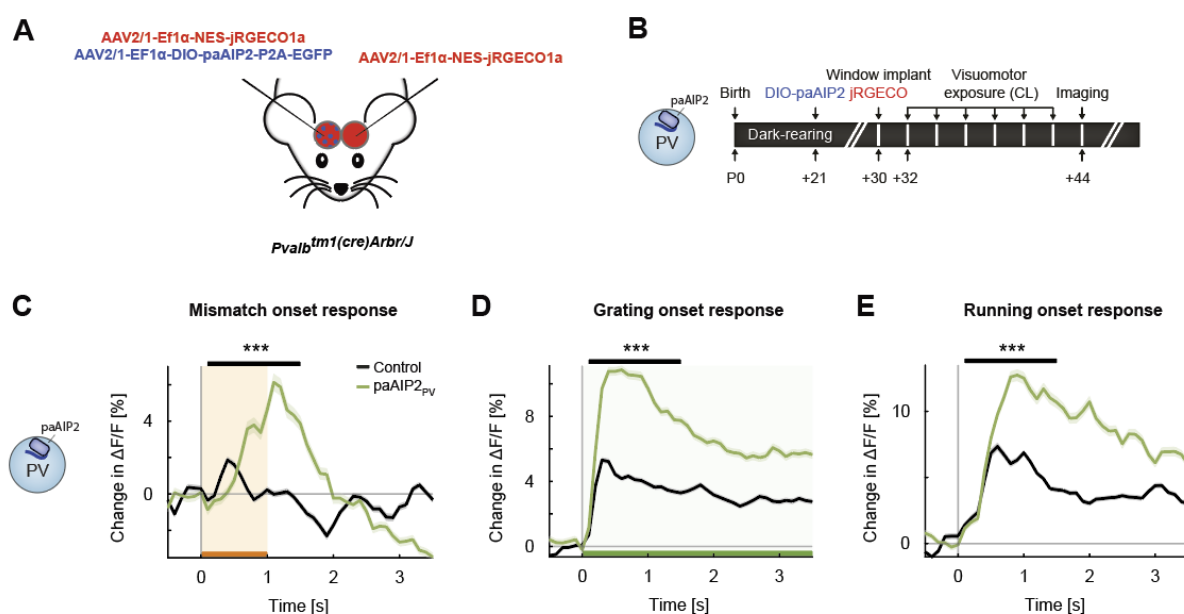

557

558 **Figure S3. Inhibiting CaMKII in PV interneurons resulted in an overall increase in onset responses in**  
559 **L2/3 excitatory neurons. Related to Figure 5.**

560 (A) We unilaterally injected an eGFP-tagged paAIP2 or DIO-paAIP2 expressing virus and a calcium  
561 indicator (jRGECO1a) bilaterally in V1.

562 (B) 6 PV-Cre mice were dark reared from birth. AAV injections occurred at postnatal day 21 (DIO-  
563 paAIP2) and P30 (jRGECO1a). Imaging window implantation occurred on P30. Mice had 6 closed-loop  
564 training sessions (visuomotor exposure) during which we illuminated cortex bilaterally with blue light  
565 (473 nm) to inhibit CaMKII.

566 (C) The average population response to mismatch was stronger in the paAIP2<sub>PV</sub> (green) than in the  
567 control (black) hemispheres. Orange shading and bar indicate duration of mismatch. Shading indicates  
568 SEM. Mean responses are compared across neurons in the time window indicated by the black bar  
569 above the traces. Here and in subsequent panels, n.s.:  $p > 0.05$ , \*:  $p < 0.05$ , \*\*:  $p < 0.01$ , \*\*\*:  $p < 0.001$ .  
570 For all details of statistical testing, see **Table S1**.

571 (D) As in C, but for responses to the onset of a drifting grating stimulus (see Methods). Green shading  
572 and bar indicate presence of grating stimulus.

573 (E) As in C, but for running onset responses in closed-loop sessions.

574

575

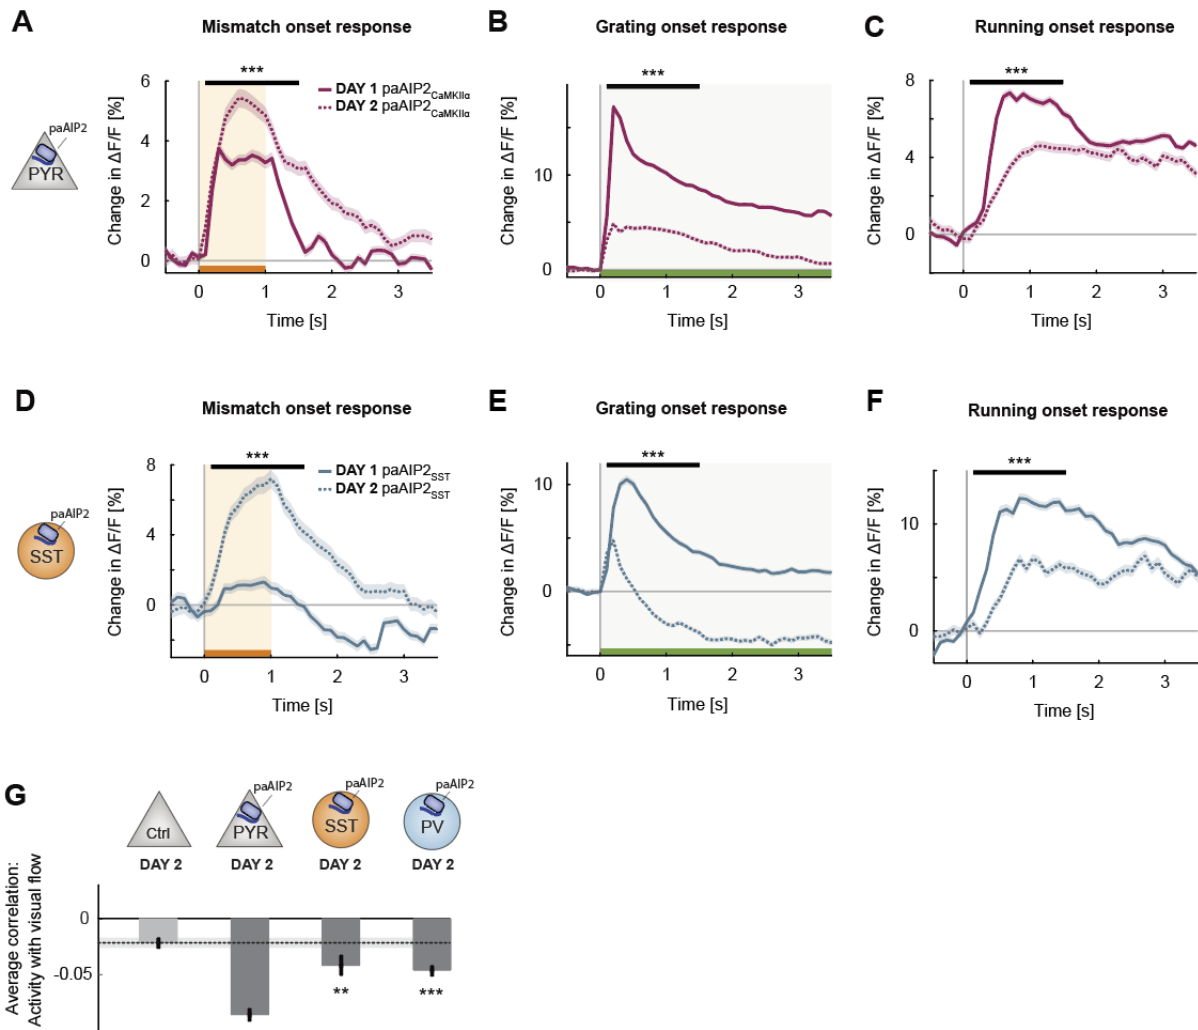

576

577 **Figure S4. Changes induced by CaMKII inhibition quickly reverted with exposure to normal**  
 578 **visuomotor coupling. Related to Figure 5.**

579 **(A)** The average population response to mismatch on day 2 of imaging (dashed) and on day 1 of  
 580 imaging (solid). Shading indicates SEM. Orange shading and bar indicate duration of mismatch. Mean  
 581 responses are compared across neurons in the time window indicated by the black bar above the  
 582 traces. Here and in subsequent panels, n.s.:  $p > 0.05$ , \*:  $p < 0.05$ , \*\*:  $p < 0.01$ , \*\*\*:  $p < 0.001$ . For all  
 583 details of statistical testing, see **Table S1**.

584 **(B)** As in **A**, but for responses to the onset of a drifting grating stimulus (see Methods). Green shading  
 585 and bar indicate presence of grating stimulus.

586 **(C)** As in **A**, but for running onset responses in closed-loop sessions.

587 **(D)** As in **A**, but for inhibition of CaMKII in SST interneurons using paAIP2.

588 **(E)** As in **B**, but for inhibition of CaMKII in SST interneurons using paAIP2.

589 **(F)** As in **C**, but for inhibition of CaMKII in SST interneurons using paAIP2.

590 **(G)** Mean correlation between neuronal activity and visual flow in open-loop sessions for all L2/3  
 591 neurons recorded in the paAIP2 inhibited hemispheres of paAIP2<sub>CaMKII $\alpha$</sub> , paAIP2<sub>SST</sub>, and paAIP2<sub>PV</sub> mice  
 592 on day 2, compared to the responses in the adult control group. Error bars indicate SEM across

593 neurons. Dashed line (black) indicates mean correlation of activity and visual flow of the adult control  
 594 group; gray shading indicates SEM across neurons. Comparison against normally reared, adult control  
 595 data: n.s.:  $p > 0.05$ , \*\*:  $p < 0.01$ , \*\*\*:  $p < 0.001$ .

## 596 METHODS

### 597 Key Resources Table

| REAGENT or RESOURCE                                                                           | Source                         | Identifier                                       |
|-----------------------------------------------------------------------------------------------|--------------------------------|--------------------------------------------------|
| <b>Bacterial and Virus Strains</b>                                                            |                                |                                                  |
| AAV2/1-EF1 $\alpha$ -GCamp6f-WPRE (6.0 10 <sup>11</sup> - 8.0 10 <sup>12</sup> GC/ml)         | FMI vector core                | vector.fmi.ch                                    |
| AAV2/1-EF1 $\alpha$ -Cre-t2a-mcherry-WPRE (3.2 10 <sup>11</sup> – 1.2 10 <sup>13</sup> GC/ml) | FMI vector core                | vector.fmi.ch                                    |
| AAV2/1-EF1 $\alpha$ -Cre-WPRE (2.810 <sup>10</sup> GC/ml)                                     | FMI vector core                | vector.fmi.ch                                    |
| AAV2/1-EF1 $\alpha$ -NES-jRGECO1a-WPRE (4.8 10 <sup>13</sup> GC/ml)                           | FMI vector core                | vector.fmi.ch                                    |
| AAV2/1-CaMKII $\alpha$ (1.3kb)-mEGFP-P2A-paAIP2 (1.80 10 <sup>13</sup> GC/ml)                 | FMI vector core                | vector.fmi.ch                                    |
| AAV2/1-EF1 $\alpha$ -DIO-mEGFP-P2A-paAIP2-WPRE (1.2 10 <sup>13</sup> GC/ml)                   | FMI vector core                | vector.fmi.ch                                    |
| <b>Chemicals, Peptides, and Recombinant Proteins</b>                                          |                                |                                                  |
| Fentanyl citrate                                                                              | Actavis                        | CAS 990-73-8                                     |
| Midazolam (Dormicum)                                                                          | Roche                          | CAS 59467-96-8                                   |
| Medetomidine (Dormitor)                                                                       | Orion Pharma                   | CAS 86347-14-0                                   |
| Ropivacaine                                                                                   | Presenius Kabi                 | CAS 132112-35-7                                  |
| Lidocaine                                                                                     | Bichsel                        | CAS 137-58-6                                     |
| Buprenorphine                                                                                 | Reckitt Benckiser Healthcare   | CAS 52485-79-7                                   |
| Ophthalmic gel (Humigel)                                                                      | Virbac                         | N/A                                              |
| Flumazenil (Anexate)                                                                          | Roche                          | CAS 78755-81-4                                   |
| Atipamezole (Antisedan)                                                                       | Orion Pharma                   | CAS 104054-27-5                                  |
| N-Butyl-2-cyanoacrylate (Histoacryl)                                                          | Braun                          | CAS 6606-65-1                                    |
| Dental cement (Paladur)                                                                       | Heraeus Kulzer                 | CAS 9066-86-8                                    |
| MK-801                                                                                        | Sigma                          | CAS 77086-22-7                                   |
| <b>Deposited data</b>                                                                         |                                |                                                  |
| All data and code used to generate manuscript figures                                         | This paper                     | data.fmi.ch                                      |
| <b>Experimental Models: Organisms/Strains</b>                                                 |                                |                                                  |
| <i>Mus musculus</i> : C57BL/6J                                                                | Charles River                  | N/A                                              |
| <i>Mus musculus</i> : <i>Grin1</i> <sup>tm2Stl/J</sup>                                        | Jackson laboratories           | Cat#005246                                       |
| <i>Mus musculus</i> : <i>Pvalb</i> <sup>tm1(cre)Arbr</sup>                                    | Jackson laboratories           | Cat#008069                                       |
| <i>Mus musculus</i> : <i>Sst</i> <sup>tm2.1(cre)Zjh</sup>                                     | Jackson laboratories           | Cat#018973                                       |
| <b>Software and algorithms</b>                                                                |                                |                                                  |
| MATLAB (2020B)                                                                                | The MathWorks                  | RRID: SCR_001622                                 |
| LabView                                                                                       | National Instruments           | RRID:SCR_014325                                  |
| Two-photon acquisition software                                                               | Keller laboratory              | sourceforge.net/p/iris-scanning/                 |
| Image data processing software                                                                | Keller laboratory              | sourceforge.net/p/iris-scanning/calliope         |
| Python                                                                                        | python.org                     | RRID:SCR_008394                                  |
| Panda3D                                                                                       | panda3d.org                    | N/A                                              |
| <b>Other</b>                                                                                  |                                |                                                  |
| mRNA probe Mm-Grin1-O1 (probe region 2892 - 4127)                                             | ACD bio                        | Cat#473079                                       |
| Virtual reality and two-photon setup                                                          | (Leinweber et al., 2014, 2017) | DOI: 10.3791/50885, 10.1016/j.neuron.2017.08.036 |
| Opto-stimulation laser (OBIS 473 nm LX)                                                       | Coherent                       | Cat#1187194                                      |
| Titanium headplate                                                                            | FMI/ETHZ workshop              | N/A                                              |
| Dental drill                                                                                  | Meisinger                      | N/A                                              |

598

## 599 **Animals and surgery**

600 All animal procedures were approved by and carried out in accordance with guidelines of the  
601 Veterinary Department of the Canton Basel-Stadt, Switzerland. For all surgical procedures, mice were  
602 anesthetized with a mixture of Fentanyl (0.05 mg/kg; Actavis), Midazolam (5.0 mg/kg; Dormicum,  
603 Roche) and Medetomidine (0.5 mg/kg; Domitor, Orion). Analgesics were applied perioperatively (2%  
604 Lidocaine gel, Meloxicam 5mg/kg) and post-operatively (Buprenorphine 0.1 mg/kg, Metacam 5  
605 mg/kg). Eyes were covered with ophthalmic gel (Virbac Schweiz AG). At postnatal day P21, we injected  
606 approximately 100 nl of AAV2/1-Ef1 $\alpha$ -Cre-T2A-mCherry vector at a titer of between 3.2 10<sup>11</sup> and 1.2  
607 10<sup>13</sup> GC/ml, or AAV2/1-EF1 $\alpha$ -Cre-WPRE vector at a titer of 2.8 10<sup>10</sup> GC/ml (**Figures 1-4**); AAV2/1-  
608 CaMKII $\alpha$ (1.3kb)-mEGFP-P2A-paAIP2 vector at a titer of 1.8 10<sup>13</sup> GC/ml, or AAV2/1-EF1 $\alpha$ -DIO-mEGFP-  
609 P2A-paAIP2-WPRE vector at a titer of 1.2 10<sup>13</sup> GC/ml (**Figure 5**) through a small hole in the skull over  
610 the right hemisphere at 2.4 mm directly lateral from lambda.

611 For window implantations at P30, we performed a cranial window surgery by implanting a circular 4  
612 mm glass coverslip bilaterally, following injections of approximately 200 nl of AAV vectors (AAV2/1-  
613 EF1 $\alpha$ -GCaMP6f-WPRE or AAV2/1-EF1 $\alpha$ -NES-jRGECO1a-WPRE) into V1, 2.5 mm lateral from lambda.

## 614 **Virtual reality environment and virtual navigation task**

615 In all experiments involving the virtual reality system, mice were head-fixed and mounted on a  
616 spherical treadmill, as described previously (Leinweber et al., 2014). In brief, mice were free to run on  
617 an air supported polystyrene ball. Ball rotation controlled movement in a virtual reality environment  
618 displayed on a toroidal screen surrounding the mouse and covered approximately 240 degrees  
619 horizontally and 100 degrees vertically of visual space, from the point of view of the mouse.

620 First visual and visuomotor exposure of the mice occurred in this virtual reality environment in the 12  
621 days prior to imaging experiments. Mice were trained for 2 hours every other day (for a total of 6  
622 sessions) with closed-loop feedback between forward locomotion and backward visual flow in a virtual  
623 corridor with walls textured with vertical sinusoidal gratings (Attinger et al., 2017). All two-photon  
624 imaging experiments were also performed on the same virtual reality setup, and unless otherwise  
625 noted, data were acquired in sessions of 5-15 minutes duration in the following sequence: Closed-  
626 loop, open-loop, dark, grating. In closed-loop sessions, running was coupled to movement in the same  
627 virtual environment used during visuomotor exposure. In open-loop sessions, the self-generated  
628 visual flow from the preceding closed-loop session was replayed. In grating sessions, drifting grating  
629 stimuli of different directions (0, 45, 90, 270 degrees, moving in either direction) were presented in  
630 random sequences. Each grating lasted between 3 s to 8 s with an inter-trial interval (gray screen) of  
631 between 2 s and 6 s. For all experiments, rotation of the ball was restricted to the transverse axis to

632 allow only forward and backward movement in the virtual reality environment. Mice were free to run  
633 in all experiments and did so spontaneously.

634 For the virtual navigation experiments (**Figure 4**), rotation of the ball was not restricted, and mice  
635 could control forward and backward motion, as well as rotation in the virtual environment. To  
636 incentivize mice to engage in the visuomotor skill learning task, they were water-restricted with access  
637 to 1 mL water daily 3 days before the start of the behavioral experiments. Care was taken to prevent  
638 a drop in body weight to below 80% throughout training. During the experiment, mice could obtain  
639 water rewards by reaching the end of the virtual corridor, after which they were presented with a 5  
640 second gray screen and teleported to the beginning of the corridor again. Task difficulty was increased  
641 with increasing performance of the mice by expanding the length of the virtual corridor to keep the  
642 rate of water rewards roughly constant. At the beginning of training the length-to-width ratio of the  
643 corridor was 5. Every 4 trials, the length of the corridor would be updated by a factor between 1 (no  
644 change) and 1.5 (50% increase in length), where the factor was determined as 20 s divided by the  
645 mean duration of those 4 trials. Maximum corridor length was restricted to 400% of the length on the  
646 first day. Visual offset perturbations were introduced once per trial, presented at a random position  
647 within 20% and 80% of the total corridor length and consisted of 30° heading offsets introduced  
648 randomly, either to the left or to the right. The task performance index (PI) was calculated as follows:

$$649 \quad PI = \frac{\int \cos(\theta(t)) * v(t) dt}{\int v(t) dt} * \frac{\text{time spent running}}{\text{total time}}$$

650 Where  $\theta(t)$  is the direction of running relative to the target, and  $v(t)$  is the running speed of the mouse.  
651 The intuition behind this index is to quantify performance as the fraction of distance traveled in the  
652 direction of the target, normalized by the total distance traveled. The second factor is added to reduce  
653 variability driven by a short time spent running, as is typical in early training sessions.

#### 654 **Two-photon calcium imaging**

655 Two-photon imaging of L2/3 neurons in V1 was performed as described previously (Leinweber et al.,  
656 2014, 2017). In brief, two-photon imaging was done using a modified Thorlabs Bergamo I or II  
657 microscope. Excitation light source was a tunable, femtosecond-pulsed laser (Insight, Spectra Physics,  
658 tuned to 910 nm or 980 nm for GCaMP6f excitation, and 1030 nm for jRGECO1a excitation). The scan  
659 head was based on an 8 kHz or 12 kHz resonant scanner (Cambridge Technology). We used a piezo  
660 electric linear actuator (P-726, Physik Instrumente) to sequentially image 4 z-planes (approximately  
661 40  $\mu\text{m}$  apart) by moving a 16x, 0.8 NA objective (Nikon N16XLWD-PF). Emission light was band-pass  
662 filtered using a 525/50 nm or a 607/70 nm filter (Semrock), detected by a photomultiplier tube (PMT,  
663 H7422P, Hamamatsu), amplified (DHPCA-100, Femto), digitized at 800 MHz (NI5772, National

664 Instruments) and band-pass filtered at 80 MHz using digital Fourier transform on a field-  
665 programmable gate array (NI5772, National Instruments, loaded with custom-designed logic). Images  
666 were acquired at 750 by 400 pixels using custom-written LabView software (available on a public  
667 SourceForge repository, see Key Resources table), with 10 or 15 frames per z-plane per second and a  
668 field of view of approximately 375  $\mu\text{m}$  by 300  $\mu\text{m}$ . Whenever possible, imaging was performed in both  
669 control and intervention hemisphere in each mouse. In a subset of mice, (see **Table S2**) imaging was  
670 only possible in one hemisphere as imaging quality did not meet our minimum quality standards in  
671 the other (clear image visible in single frame at less than 60 mW total laser power).

### 672 **Conditional *Grin1* knockout, histology, and pharmacological NMDA receptor inhibition**

673 All  $\Delta Grin1$  knockout experiments were performed using the *Grin1*<sup>tm2Stl</sup> (also known as fNR1 or NR1<sup>flox</sup>)  
674 mouse line (Tsien et al., 1996), which has a pair of loxP sites flanking the transmembrane domain and  
675 C-terminal region of the *Grin1* gene that codes for GluN1 (also referred to as NR1), a subunit essential  
676 to the NMDA receptor (Monyer et al., 1994). We confirmed the knockout using mRNA in situ  
677 hybridization (RNAscope, Ventana) in a separate cohort of 3 mice, 14 days after injection of an AAV  
678 vector expressing Cre recombinase in both juvenile and adult mice ( $\Delta Grin1$ <sub>juv, adult</sub>). We followed a  
679 standardized formaldehyde-fixed paraffin-embedded protocol. In brief, mice were transcardially  
680 perfused with phosphate buffered saline (PBS), followed by perfusion with a solution of 4%  
681 paraformaldehyde (PFA) in PBS. Brains were isolated, post-fixed overnight in 4% PFA, paraffinized for  
682 24 h, and cut at 5  $\mu\text{m}$  using a microtome (ThermoFisher). Slices were stained using hematoxylin to  
683 mark cell bodies, and Mm-*Grin1*-O1 (#473079, target region 2892 - 4127, ACDBio) to label *Grin1* mRNA.  
684 To ease identification of the knockout area in two-photon microscopy, a vector co-expressing a red  
685 fluorophore (mCherry) and Cre was used to induce the *Grin1* knockout in most experiments. Due to a  
686 shortage of the correct vector, a subset (6 of 14) of the  $\Delta Grin1$ <sub>adult</sub> experiments were performed  
687 without the mCherry fluorophore. For pharmacological NMDA receptor inhibition experiments  
688 (**Figures S1C-D**), adult wild-type mice were injected with 0.1 mg/kg MK-801 intraperitoneally and  
689 neuronal activity was recorded before and after injection.

### 690 **Optogenetic activation of paAIP2 and laser attenuation measurements**

691 We used a photoactivatable autocamtide inhibitory peptide 2 (paAIP2) (Murakoshi et al., 2017) to  
692 inhibit calcium/calmodulin-dependent kinase II (CaMKII) for the entire duration of the visuomotor  
693 exposure in the virtual reality environment. We directed a blue laser (OBIS 473 nm LX 75 mW,  
694 Coherent) onto V1 in both hemispheres using a galvo-galvo system and a set of mirrors and lenses  
695 (GVSM002-EC/M, Thorlabs). Beam diameter on the cortical surface was 3 mm. Light was triggered at  
696 0.2 Hz with a duty cycle of 20% (1 s on, 4 s off). During illumination periods, we alternated between

697 the two hemispheres at 50 Hz. Peak laser power was 20 mW, which resulted in a time-averaged power  
698 density at the cortical surface of 0.28 mW/mm<sup>2</sup>. To measure the laser attenuation through tissue  
699 (**Figure S2A**), we prepared slices of fresh brain tissue of 100 μm, 200 μm, 300 μm, 400 μm and 500 μm  
700 thickness. We then illuminated slices with the blue laser used for optogenetic inhibition of CaMKII set  
701 to 20 mW power and measured the fraction of power transmitted through each slice using a power  
702 meter (PM100D, Thorlabs).

### 703 **Data analysis**

704 Calcium imaging data were processed as described previously (Keller et al., 2012). In brief, raw images  
705 were full-frame registered to correct for lateral brain motion. Neurons were selected manually based  
706 on mean and maximum fluorescence images. Average fluorescence per neurons over time was  
707 corrected for slow fluorescence drift using an 8<sup>th</sup> percentile filter and a 100 s window (Dombeck et al.,  
708 2007) and divided by the median value over the entire trace to calculate  $\Delta F/F$ .

709 Data analysis was performed with custom analysis scripts written in MATLAB 2020b (MathWorks). For  
710 all population onset responses, data were first averaged over onsets for each neuron and then  
711 averaged over neurons. Unless stated otherwise, shading and error bars indicate the standard error  
712 of the mean (SEM) across neurons. We did not test for normality of distributions. For analysis of onset  
713 responses (**Figures 1E-1G**, **Figures 2A-2C**, **Figures 5C-5H**, **Figures S4A-S4F**), recording sites with less  
714 than 3 running or mismatch onsets in a particular session were excluded from analysis (e.g., if a mouse  
715 ran without stopping for the entire closed-loop session, there were no running onsets to analyze). We  
716 also excluded 2 sessions in which the mouse did not run without prompting by the experimenter. In  
717 total, we excluded 10 of 128 sessions. In 31 of 118 of the remaining sessions, we did not record grating  
718 responses. To calculate stimulus induced changes in  $\Delta F/F$ , we used a baseline subtraction window of  
719 -300 ms to 0 ms, and a response window of +100 ms to +1500 ms relative to stimulus onset. To  
720 determine running onsets, we used a threshold of 10<sup>-2</sup> cm/s. For analysis of average activity levels in  
721 closed-loop sessions (**Figure 1H**, **Figure 2D**, **Figure S1C**), we calculated the average neuronal activity  
722 ( $\Delta F/F$  [%]) over time and over neurons. To calculate average pairwise correlation between neurons in  
723 closed-loop sessions (**Figure 1J**, **Figure 2F**, **Figure S1D**, **Figures S2B**), we calculated the mean  
724 correlation of each neuron with all other neurons. To calculate the first principal component (**Figure**  
725 **1I**, **Figure 2E**, **Figure S1B**), we calculated the eigenvectors of the covariance matrix of the mean-  
726 subtracted visual flow and running correlations with neuronal activity. The principal component angle  
727 was defined as the angle between the first principal component and the y axis.

728 **Table S1. Statistics**

729 All values are rounded to two significant decimals, except values smaller than  $10^{-5}$ . The tests used,  
 730 were two-sample independent t-test (t-test 2), one sample t-test (t-test 1), or a bootstrap estimate  
 731 of the 95% confidence interval (CI).

| Reference                | Description                                                                                | Test     | N <sub>1</sub> | N <sub>2</sub> | Unit    | P-value/CI        |
|--------------------------|--------------------------------------------------------------------------------------------|----------|----------------|----------------|---------|-------------------|
| <b>Figure 1E-G</b>       | Control (N <sub>1</sub> ) vs $\Delta Grin1_{juv}$ (N <sub>2</sub> )                        |          |                |                |         |                   |
|                          | Mismatch response                                                                          | t-test 2 | 794            | 551            | neurons | 0.000082          |
|                          | Drifting grating response                                                                  | t-test 2 | 794            | 551            | neurons | 0.030             |
|                          | Running onset response (closed-loop)                                                       | t-test 2 | 794            | 551            | neurons | 0.054             |
| <b>Figure 1H</b>         | Control (N <sub>1</sub> ) vs $\Delta Grin1_{juv}$ (N <sub>2</sub> )                        | t-test 2 | 2625           | 1986           | neurons | 0.81              |
| <b>Figure 1J</b>         | Control (N <sub>1</sub> ) vs $\Delta Grin1_{juv}$ (N <sub>2</sub> )                        | t-test 2 | 2625           | 1986           | neurons | <10 <sup>-5</sup> |
| <b>Figure 2A-C</b>       | $\Delta Grin1_{adult}$ (N <sub>2</sub> ) vs control (N <sub>1</sub> )                      |          |                |                |         |                   |
|                          | Mismatch response                                                                          | t-test 2 | 912            | 1184           | neurons | 0.45              |
|                          | Drifting grating response                                                                  | t-test 2 | 912            | 1184           | neurons | 0.57              |
|                          | Running onset response (closed-loop)                                                       | t-test 2 | 912            | 1184           | neurons | 0.45              |
| <b>Figure 2D</b>         | Control (N <sub>1</sub> ) vs $\Delta Grin1_{adult}$ (N <sub>2</sub> )                      | t-test 2 | 1281           | 1547           | neurons | <10 <sup>-5</sup> |
| <b>Figure 2F</b>         | Control (N <sub>1</sub> ) vs $\Delta Grin1_{adult}$ (N <sub>2</sub> )                      | t-test 2 | 1281           | 1547           | neurons | <10 <sup>-5</sup> |
| <b>Figure 3C</b>         | Control <sub>adult</sub> (N <sub>1</sub> ) vs                                              |          |                |                |         |                   |
|                          | $\Delta Grin1_{juv}$ control (N <sub>2</sub> )                                             | t-test 2 | 869            | 794            | neurons | 0.15              |
|                          | $\Delta Grin1_{juv}$ (N <sub>2</sub> )                                                     | t-test 2 | 869            | 551            | neurons | 0.000038          |
|                          | $\Delta Grin1_{adult}$ control (N <sub>2</sub> )                                           | t-test 2 | 869            | 912            | neurons | 0.37              |
|                          | $\Delta Grin1_{adult}$ (N <sub>2</sub> )                                                   | t-test 2 | 869            | 986            | neurons | 0.24              |
| <b>Figure 4C (top)</b>   | $\Delta Grin1_{juv}$ average performance index on day 1-2 vs 6-7                           | t-test 1 | 6              | 6              | mice    | 0.22              |
|                          | $\Delta Grin1_{adult}$ average performance index on day 1-2 vs 6-7                         | t-test 1 | 13             | 13             | mice    | 0.00015           |
|                          | Control <sub>juv</sub> average performance index on day 1-2 vs 6-7                         | t-test 1 | 6              | 6              | mice    | 0.0037            |
| <b>Figure 4C (right)</b> | Average performance index on day 6-7                                                       |          |                |                |         |                   |
|                          | Control <sub>juv</sub> (N <sub>1</sub> ) vs $\Delta Grin1_{juv}$ (N <sub>2</sub> )         | t-test 2 | 6              | 6              | mice    | 0.0013            |
|                          | Control <sub>juv</sub> (N <sub>1</sub> ) vs $\Delta Grin1_{adult}$ (N <sub>2</sub> )       | t-test 2 | 6              | 13             | mice    | 0.016             |
|                          | $\Delta Grin1_{juv}$ (N <sub>1</sub> ) vs $\Delta Grin1_{adult}$ (N <sub>2</sub> )         | t-test 2 | 6              | 13             | mice    | 0.39              |
| <b>Figure 4E</b>         | Control <sub>juv</sub> (N <sub>1</sub> ) vs $\Delta Grin1_{juv}$ (N <sub>2</sub> )         | t-test 2 | 6              | 6              | mice    | 0.027             |
|                          | Control <sub>juv</sub> (N <sub>1</sub> ) vs $\Delta Grin1_{adult}$ (N <sub>2</sub> )       | t-test 2 | 6              | 13             | mice    | 0.17              |
|                          | $\Delta Grin1_{juv}$ (N <sub>1</sub> ) vs $\Delta Grin1_{adult}$ (N <sub>2</sub> )         | t-test 2 | 6              | 13             | mice    | 0.028             |
|                          | Control <sub>juv</sub> (N <sub>1</sub> ) vs 0                                              | t-test 1 | 6              | N/A            | mice    | 0.0057            |
|                          | $\Delta Grin1_{juv}$ (N <sub>1</sub> ) vs 0                                                | t-test 1 | 6              | N/A            | mice    | 0.91              |
|                          | $\Delta Grin1_{adult}$ (N <sub>1</sub> ) vs 0                                              | t-test 1 | 13             | N/A            | mice    | 0.0019            |
| <b>Figure 5C-E</b>       | Control (N <sub>1</sub> ) vs paAIP2 <sub>CaMKII<math>\alpha</math></sub> (N <sub>2</sub> ) |          |                |                |         |                   |
|                          | Mismatch response                                                                          | t-test 2 | 781            | 928            | neurons | <10 <sup>-5</sup> |
|                          | Drifting grating response                                                                  | t-test 2 | 781            | 928            | neurons | <10 <sup>-5</sup> |
|                          | Running onset response (closed-loop)                                                       | t-test 2 | 781            | 928            | neurons | 0.0013            |
| <b>Figure 5F-H</b>       | Control (N <sub>1</sub> ) vs paAIP2 <sub>SST</sub> (N <sub>2</sub> )                       |          |                |                |         |                   |
|                          | Mismatch response                                                                          | t-test 2 | 1277           | 807            | neurons | <10 <sup>-5</sup> |
|                          | Drifting grating response                                                                  | t-test 2 | 1277           | 807            | neurons | <10 <sup>-5</sup> |
|                          | Running onset response (closed-loop)                                                       | t-test 2 | 1277           | 807            | neurons | <10 <sup>-5</sup> |
| <b>Figure 6A</b>         | Control <sub>adult</sub> (N <sub>1</sub> ) vs                                              |          |                |                |         |                   |
|                          | $\Delta Grin1_{adult}$ (N <sub>2</sub> )                                                   | t-test 2 | 1000           | 1516           | neurons | <10 <sup>-5</sup> |
|                          | $\Delta Grin1_{juv}$ (N <sub>2</sub> )                                                     | t-test 2 | 1000           | 1547           | neurons | 0.0032            |
|                          | paAIP2 <sub>CaMKII<math>\alpha</math></sub> (N <sub>2</sub> )                              | t-test 2 | 1000           | 928            | neurons | <10 <sup>-5</sup> |
|                          | paAIP2 <sub>SST</sub> (N <sub>2</sub> )                                                    | t-test 2 | 1000           | 1022           | neurons | <10 <sup>-5</sup> |
|                          | vs paAIP2 <sub>PV</sub> (N <sub>2</sub> )                                                  | t-test 2 | 1000           | 1705           | neurons | 0.013             |

732



| Reference                 | Description                                                                                                                                | Test     | N <sub>1</sub>  | N <sub>2</sub> | Unit       | P-value/CI        |
|---------------------------|--------------------------------------------------------------------------------------------------------------------------------------------|----------|-----------------|----------------|------------|-------------------|
| <b>Figure S1A</b>         | CT (N <sub>1</sub> ) vs $\Delta Grin1_{juv}$ control (N <sub>2</sub> )                                                                     | t-test 2 | 2259            | 2080           | neurons    | 0.14              |
|                           | NT (N <sub>1</sub> ) vs $\Delta Grin1_{juv}$ (N <sub>2</sub> )                                                                             | t-test 2 | 2103            | 1516           | neurons    | 0.57              |
| <b>Figure S1B (left)</b>  | CT                                                                                                                                         | CI       | 10 <sup>4</sup> | N/A            | PCA angles | [-34.36, -4.16]   |
|                           | NT                                                                                                                                         | CI       | 10 <sup>4</sup> | N/A            | PCA angles | [ 29.63, 43.40]   |
| <b>Figure S1B (right)</b> | $\Delta Grin1_{juv}$ control                                                                                                               | CI       | 10 <sup>4</sup> | N/A            | PCA angles | [-50.73, -13.77]  |
|                           | $\Delta Grin1_{juv}$                                                                                                                       | CI       | 10 <sup>4</sup> | N/A            | PCA angles | [-10.66, 10.90]   |
| <b>Figure S1C</b>         | Pre (N <sub>1</sub> ) vs post (N <sub>2</sub> ) MK-801                                                                                     | t-test 2 | 2443            | 2443           | neurons    | <10 <sup>-5</sup> |
| <b>Figure S1D</b>         | Pre (N <sub>1</sub> ) vs post (N <sub>2</sub> ) MK-801                                                                                     | t-test 2 | 2443            | 2443           | neurons    | <10 <sup>-5</sup> |
| <b>Figure S2B</b>         | Control (N <sub>1</sub> ) vs paAIP2 <sub>CaMKII<math>\alpha</math></sub> (N <sub>2</sub> )                                                 | t-test 2 | 781             | 928            | neurons    | <10 <sup>-5</sup> |
| <b>Figure S3C-E</b>       | Control (N <sub>1</sub> ) vs paAIP2 <sub>PV</sub> (N <sub>2</sub> )                                                                        |          |                 |                |            |                   |
|                           | Mismatch response                                                                                                                          | t-test 2 | 1256            | 919            | neurons    | <10 <sup>-5</sup> |
|                           | Drifting grating response                                                                                                                  | t-test 2 | 1256            | 919            | neurons    | <10 <sup>-5</sup> |
|                           | Running onset response (closed-loop)                                                                                                       | t-test 2 | 1256            | 919            | neurons    | <10 <sup>-5</sup> |
| <b>Figure S4A-C</b>       | paAIP2 <sub>CaMKII<math>\alpha</math></sub> day 1 (N <sub>1</sub> ) vs paAIP2 <sub>CaMKII<math>\alpha</math></sub> day 2 (N <sub>2</sub> ) |          |                 |                |            |                   |
|                           | Mismatch response                                                                                                                          | t-test 2 | 928             | 926            | neurons    | <10 <sup>-5</sup> |
|                           | Drifting grating response                                                                                                                  | t-test 2 | 928             | 926            | neurons    | <10 <sup>-5</sup> |
|                           | Running onset response (closed-loop)                                                                                                       | t-test 2 | 928             | 926            | neurons    | <10 <sup>-5</sup> |
| <b>Figure S4D-F</b>       | paAIP2 <sub>SST</sub> day 1 (N <sub>1</sub> ) vs paAIP2 <sub>CaMKII<math>\alpha</math></sub> day 2 (N <sub>2</sub> )                       |          |                 |                |            |                   |
|                           | Mismatch response                                                                                                                          | t-test 2 | 807             | 397            | neurons    | <10 <sup>-5</sup> |
|                           | Drifting grating response                                                                                                                  | t-test 2 | 807             | 397            | neurons    | <10 <sup>-5</sup> |
|                           | Running onset response (closed-loop)                                                                                                       | t-test 2 | 807             | 397            | neurons    | <10 <sup>-5</sup> |
| <b>Figure S4G</b>         | Control <sub>adult</sub> (N <sub>1</sub> ) vs                                                                                              |          |                 |                |            |                   |
|                           | paAIP2 <sub>CaMKII<math>\alpha</math></sub> (N <sub>2</sub> )                                                                              | t-test 2 | 1000            | 926            | neurons    | <10 <sup>-5</sup> |
|                           | paAIP2 <sub>SST</sub> (N <sub>2</sub> )                                                                                                    | t-test 2 | 1000            | 397            | neurons    | 0.0044            |
|                           | paAIP2 <sub>PV</sub> (N <sub>2</sub> )                                                                                                     | t-test 2 | 1000            | 492            | neurons    | <10 <sup>-5</sup> |

733

#### 734 **Table S2. Number of mice per group**

735 We imaged all experimental mice on both hemispheres whenever possible. The table below lists the  
 736 number of mice as a function of whether they were imaged in the control (Ctrl) or the intervention  
 737 (Int.) hemisphere only, or in both hemispheres.

| Dataset                                     | Number of mice |           |      |           |
|---------------------------------------------|----------------|-----------|------|-----------|
|                                             | Ctrl only      | Int. only | Both | Total     |
| $\Delta Grin1_{juv}$                        | 4              | 5         | 10   | <b>19</b> |
| $\Delta Grin1_{adult}$                      | 1              | 3         | 10   | <b>14</b> |
| paAIP2 <sub>CaMKII<math>\alpha</math></sub> | 0              | 0         | 6    | <b>6</b>  |
| paAIP2 <sub>SST</sub>                       | 1              | 0         | 6    | <b>7</b>  |
| paAIP2 <sub>PV</sub>                        | 0              | 0         | 6    | <b>6</b>  |
| <b>MK-801</b>                               | 0              | 9         | 0    | <b>9</b>  |
| Control <sub>adult</sub>                    | 12             | 0         | 0    | <b>12</b> |

738

#### 739 **Data and code availability**

740 Software for controlling the two-photon microscope and preprocessing of the calcium imaging data is  
 741 available on <https://sourceforge.net/projects/iris-scanning/>. Raw data and code to generate all figures  
 742 of this manuscript are available on <https://data.fmi.ch/PublicationSupplementRepo/>.

743 **Acknowledgements**

744 We thank all the members of the Keller lab for discussion and support and Tingjia Lu and Daniela  
745 Gerosa for vector production. We thank Ryohei Yasuda for valuable advice and help with paAIP2. This  
746 project has received funding from the Swiss National Science Foundation, the Novartis Research  
747 Foundation, and the European Research Council (ERC) under the European Union's Horizon 2020  
748 research and innovation programme (grant agreement No 865617).

749 **Author contributions**

750 FW designed and performed the experiments and analyzed the data. Both authors wrote the  
751 manuscript.

752 **Declaration of Interests**

753 The authors declare no competing financial interests.

754

755

756 **REFERENCES**

- 757 Atallah, B. V., Bruns, W., Carandini, M., and Scanziani, M. (2012). Parvalbumin-Expressing Interneurons  
758 Linearly Transform Cortical Responses to Visual Stimuli. *Neuron* 73, 159–170.
- 759 Attinger, A., Wang, B., and Keller, G.B. (2017). Visuomotor Coupling Shapes the Functional  
760 Development of Mouse Visual Cortex. *Cell* 169, 1291-1302.e14.
- 761 Barria, A., and Malinow, R. (2005). NMDA receptor subunit composition controls synaptic plasticity by  
762 regulating binding to CaMKII. *Neuron* 48, 289–301.
- 763 Chiu, C.Q., Martenson, J.S., Yamazaki, M., Natsume, R., Sakimura, K., Tomita, S., Tavalin, S.J., and  
764 Higley, M.J. (2018). Input-Specific NMDAR-Dependent Potentiation of Dendritic GABAergic Inhibition.  
765 *Neuron* 97, 368-377.e3.
- 766 Dombek, D.A., Khabbaz, A.N., Collman, F., Adelman, T.L., and Tank, D.W. (2007). Imaging Large-Scale  
767 Neural Activity with Cellular Resolution in Awake, Mobile Mice. *Neuron* 56, 43–57.
- 768 Fong, M.F., Finnie, P.S., Kim, T., Thomazeau, A., Kaplan, E.S., Cooke, S.F., and Bear, M.F. (2020). Distinct  
769 Laminal Requirements for NMDA Receptors in Experience-Dependent Visual Cortical Plasticity. *Cereb.*  
770 *Cortex* 30, 2555–2572.
- 771 Franklin, K.B.J., and Paxinos, G. (2012). Paxinos and Franklin's The mouse brain in stereotaxic  
772 coordinates, 4th Edition. (Elsevier).
- 773 Gambrill, A.C., and Barria, A. (2011). NMDA receptor subunit composition controls synaptogenesis and  
774 synapse stabilization. *Proc. Natl. Acad. Sci. U. S. A.* 108, 5855–5860.
- 775 Grienberger, C., and Konnerth, A. (2012). Imaging Calcium in Neurons. *Neuron* 73, 862–885.
- 776 Hamm, J.P., Peterka, D.S., Gogos, J.A., and Yuste, R. (2017). Altered Cortical Ensembles in Mouse  
777 Models of Schizophrenia. *Neuron* 94, 153-167.e8.
- 778 Hanson, P.I., Kapiloff, M.S., Lou, L.L., Rosenfeld, M.G., and Schulman, H. (1989). Expression of a  
779 multifunctional Ca<sup>2+</sup>/calmodulin-dependent protein kinase and mutational analysis of its  
780 autoregulation. *Neuron* 3, 59–70.
- 781 Hasan, M.T., Hernández-González, S., Dogbevia, G., Treviño, M., Bertocchi, I., Gruart, A., and Delgado-  
782 García, J.M. (2013). Role of motor cortex NMDA receptors in learning-dependent synaptic plasticity of  
783 behaving mice. *Nat. Commun.* 4, 2258.
- 784 Hein, A., and Held, R. (1967). Dissociation of the visual placing response into elicited and guided

- 785 components. *Science* 158, 390–392.
- 786 Heindorf, M., Arber, S., and Keller, G.B. (2018). Mouse Motor Cortex Coordinates the Behavioral  
787 Response to Unpredicted Sensory Feedback. *Neuron* 99, 1040-1054.e5.
- 788 Held, R., and Hein, A. (1963). Movement-produced stimulation in the development of visually guided  
789 behavior. *J. Comp. Physiol. Psychol.* 56, 872–876.
- 790 Herring, B.E., and Nicoll, R.A. (2016). Long-Term Potentiation: From CaMKII to AMPA Receptor  
791 Trafficking. *Annu. Rev. Physiol.* 78, 351–365.
- 792 Jordan, R., and Keller, G.B. (2020). Opposing Influence of Top-down and Bottom-up Input on Excitatory  
793 Layer 2/3 Neurons in Mouse Primary Visual Cortex. *Neuron* 108, 1194-1206.e5.
- 794 Keller, G.B., and Mrsic-Flogel, T.D. (2018). Predictive Processing: A Canonical Cortical Computation.  
795 *Neuron* 100, 424–435.
- 796 Keller, G.B., Bonhoeffer, T., and Hübener, M. (2012). Sensorimotor mismatch signals in primary visual  
797 cortex of the behaving mouse. *Neuron* 74, 809–815.
- 798 Kirkwood, A., and Bear, M.F. (1994). Hebbian synapses in visual cortex. *J. Neurosci.* 14, 1634–1645.
- 799 Lein, E.S. et al. (2007). Allen Mouse Brain Atlas : Genome-wide atlas of gene expression in the adult  
800 mouse brain. *Nature* 168–176.
- 801 Leinweber, M., Zmarz, P., Buchmann, P., Argast, P., Hübener, M., Bonhoeffer, T., and Keller, G.B.  
802 (2014). Two-photon calcium imaging in mice navigating a virtual reality environment. *J. Vis. Exp.*  
803 e50885.
- 804 Leinweber, M., Ward, D.R., Sobczak, J.M., Attinger, A., and Keller, G.B. (2017). A Sensorimotor Circuit  
805 in Mouse Cortex for Visual Flow Predictions. *Neuron* 95, 1420-1432.e5.
- 806 Leonard, A.S., Lim, I.A., Hemsworth, D.E., Horne, M.C., and Hell, J.W. (1999). Calcium/calmodulin-  
807 dependent protein kinase II is associated with the N-methyl-D-aspartate receptor. *Proc. Natl. Acad.*  
808 *Sci. U. S. A.* 96, 3239–3244.
- 809 Lisman, J., Yasuda, R., and Raghavachari, S. (2012). Mechanisms of CaMKII action in long-term  
810 potentiation. *Nat. Rev. Neurosci.* 13, 169–182.
- 811 Lo, F.S., Akkentli, F., Tsytsarev, V., and Erzurumlu, R.S. (2013). Functional significance of cortical NMDA  
812 receptors in somatosensory information processing. *J. Neurophysiol.* 110, 2627–2636.
- 813 Mizuno, H., Rao, M.S., Mizuno, H., Sato, T., Nakazawa, S., and Iwasato, T. (2021). NMDA Receptor

- 814 Enhances Correlation of Spontaneous Activity in Neonatal Barrel Cortex. *J. Neurosci.* *41*, 1207–1217.
- 815 Monyer, H., Burnashev, N., Laurie, D.J., Sakmann, B., and Seeburg, P.H. (1994). Developmental and  
816 regional expression in the rat brain and functional properties of four NMDA receptors. *Neuron* *12*,  
817 529–540.
- 818 Murakoshi, H., Shin, M.E., Parra-Bueno, P., Szatmari, E.M., Shibata, A.C.E., and Yasuda, R. (2017).  
819 Kinetics of Endogenous CaMKII Required for Synaptic Plasticity Revealed by Optogenetic Kinase  
820 Inhibitor. *Neuron* *94*, 37-47.e5.
- 821 Nicole, O., and Pacary, E. (2020). CaMKII $\beta$  in Neuronal Development and Plasticity: An Emerging  
822 Candidate in Brain Diseases. *Int. J. Mol. Sci.* *21*, 7272.
- 823 Pakan, J.M., Lowe, S.C., Dylida, E., Keemink, S.W., Currie, S.P., Coutts, C.A., and Rochefort, N.L. (2016).  
824 Behavioral-state modulation of inhibition is context-dependent and cell type specific in mouse visual  
825 cortex. *Elife* *5*.
- 826 Paoletti, P., Bellone, C., and Zhou, Q. (2013). NMDA receptor subunit diversity: Impact on receptor  
827 properties, synaptic plasticity and disease. *Nat. Rev. Neurosci.* *14*, 383–400.
- 828 Park, J., Papoutsis, A., Ash, R.T., Marin, M.A., Poirazi, P., and Smirnakis, S.M. (2019). Contribution of  
829 apical and basal dendrites to orientation encoding in mouse V1 L2/3 pyramidal neurons. *Nat.*  
830 *Commun.* *10*.
- 831 Petreanu, L., Mao, T., Sternson, S.M., and Svoboda, K. (2009). The subcellular organization of  
832 neocortical excitatory connections. *Nature* *457*, 1142–1145.
- 833 Ranson, A., Broom, E., Powell, A., Chen, F., Major, G., and Hall, J. (2019). Top-Down Suppression of  
834 Sensory Cortex in an NMDAR Hypofunction Model of Psychosis. *Schizophr. Bull.* *45*, 1349–1357.
- 835 Rodriguez, G., Mesik, L., Gao, M., Parkins, S., Saha, R., and Lee, H.K. (2019). Disruption of NMDAR  
836 function prevents normal experience-dependent homeostatic synaptic plasticity in mouse primary  
837 visual cortex. *J. Neurosci.* *39*, 7664–7673.
- 838 Sabatini, B.L., Oertner, T.G., and Svoboda, K. (2002). The life cycle of Ca<sup>2+</sup> ions in dendritic spines.  
839 *Neuron* *33*, 439–452.
- 840 Sawtell, N.B., Frenkel, M.Y., Philpot, B.D., Nakazawa, K., Tonegawa, S., and Bear, M.F. (2003). NMDA  
841 receptor-dependent ocular dominance plasticity in adult visual cortex. *Neuron* *38*, 977–985.
- 842 Stanley, J., and Miall, R.C. (2007). Functional activation in parieto-premotor and visual areas  
843 dependent on congruency between hand movement and visual stimuli during motor-visual priming.

- 844 Neuroimage 34, 290–299.
- 845 Tighilet, B., Hashikawa, T., and Jones, E.G. (1998). Cell- and lamina-specific expression and activity-  
846 dependent regulation of type II calcium/calmodulin-dependent protein kinase isoforms in monkey  
847 visual cortex. *J. Neurosci.* 18, 2129–2146.
- 848 Tobimatsu, T., and Fujisawa, H. (1989). Tissue-specific expression of four types of rat calmodulin-  
849 dependent protein kinase II mRNAs. *J. Biol. Chem.* 264, 17907–17912.
- 850 Tsien, J.Z., Chen, D.F., Gerber, D., Tom, C., Mercer, E.H., Anderson, D.J., Mayford, M., Kandel, E.R., and  
851 Tonegawa, S. (1996). Subregion- and cell type-restricted gene knockout in mouse brain. *Cell* 87, 1317–  
852 1326.
- 853 Wang, C.C., Held, R.G., Chang, S.C., Yang, L., Delpire, E., Ghosh, A., and Hall, B.J. (2011). A critical role  
854 for gluN2B-containing NMDA receptors in cortical development and function. *Neuron* 72, 789–805.
- 855 Yona, G., Meitav, N., Kahn, I., and Shoham, S. (2016). Realistic numerical and analytical modeling of  
856 light scattering in brain tissue for optogenetic applications. *ENeuro* 3, 420–424.
- 857 Young, H., Belbut, B., Baeta, M., and Petreanu, L. (2021). Lamina-specific cortico-cortical loops in  
858 mouse visual cortex. *Elife* 10, 1–25.
- 859 Zmarz, P., and Keller, G.B. (2016). Mismatch Receptive Fields in Mouse Visual Cortex. *Neuron* 92, 766–  
860 772.
- 861
